# Supplementary material for: Asymmetric desymmetrization of meso-diols by C2-symmetric chiral 4-pyrrolidinopyridines
Source: publisher site journal article supplement (doi:10.3762/bjoc.8.203), 2012-10-17

# Supporting Information

for

## Asymmetric desymmetrization of *meso*-diols by C<sub>2</sub>-symmetric chiral 4-pyrrolidinopyridines

Hartmut Schedel, Keizo Kan, Yoshihiro Ueda, Kenji Mishiro, Keisuke Yoshida, Takumi Furuta, and Takeo Kawabata\*

Address: Institute for Chemical Research, Kyoto University, Uji, Kyoto 611-0011, Japan

Email: Takeo Kawabata - kawabata@scl.kyoto-u.ac.jp

\* Corresponding author

### Experimental details and characterization data of new compounds, copies of <sup>1</sup>H NMR and <sup>13</sup>C NMR

#### Content:

|                                                                                                                                                                               |    |
|-------------------------------------------------------------------------------------------------------------------------------------------------------------------------------|----|
| General .....                                                                                                                                                                 | S2 |
| List of abbreviation .....                                                                                                                                                    | S2 |
| General procedure for the preparation of C <sub>2</sub> -symmetric catalysts .....                                                                                            | S3 |
| (2 <i>S</i> ,5 <i>S</i> )-2,5-Bis[(2 <i>S</i> )-3-(1 <i>H</i> -indol-3-yl)-1-(methyloxy)-1-oxopropan-2-ylamino]-<br>carbonyl]-1-(pyridin-4-yl)pyrrolidine ( <b>8a</b> ) ..... | S3 |
| (2 <i>S</i> ,5 <i>S</i> )-2,5-Bis[(2 <i>R</i> )-3-(1 <i>H</i> -indol-3-yl)-1-(methyloxy)-1-oxopropan-2-<br>ylamino]carbonyl]-1-(pyridin-4-yl)pyrrolidine ( <b>8b</b> ).....   | S3 |
| (2 <i>S</i> ,5 <i>S</i> )-2,5-Bis[tryptamino]carbonyl]-1-(pyridin-4-yl)pyrrolidine ( <b>9</b> ) .....                                                                         | S4 |
| (2 <i>S</i> ,5 <i>S</i> )-2,5-Bis[(2 <i>S</i> )-3-(1-(methyloxy)-1-oxoethan-2-ylamino)carbonyl]-1-<br>(pyridin-4-yl)pyrrolidine ( <b>10</b> ) .....                           | S4 |
| (2 <i>S</i> ,5 <i>S</i> )-2,5-Bis[hexylamino]carbonyl]-1-(pyridin-4-yl)pyrrolidine ( <b>11</b> ) .....                                                                        | S5 |
| (2 <i>S</i> ,5 <i>S</i> )-2,5-Bis[(2 <i>S</i> )-3-(2-naphthylmethyl)-1-(methyloxy)-1-oxopropan-2-ylamino]-<br>carbonyl]-1-(pyridin-4-yl)pyrrolidine ( <b>12a</b> ) .....      | S5 |
| (2 <i>S</i> ,5 <i>S</i> )-2,5-Bis[(2 <i>R</i> )-3-(2-naphthylmethyl)-1-(methyloxy)-1-<br>oxopropan-2-ylamino]carbonyl]-1-(pyridin-4-yl)pyrrolidine ( <b>12b</b> ).....        | S6 |
| (2 <i>S</i> ,5 <i>S</i> )-2,5-Bis[(2 <i>S</i> )-3-(isopropyl)-1-(methyloxy)-1-oxopropan-2-ylamino]-<br>carbonyl]-1-(pyridin-4-yl)pyrrolidine ( <b>13</b> ) .....              | S6 |
| (2 <i>S</i> ,5 <i>S</i> )-2,5-Bis[(2 <i>S</i> )-3-(isobutyl)-1-(methyloxy)-1-oxopropan-2-ylamino]-<br>carbonyl]-1-(pyridin-4-yl)pyrrolidine ( <b>14</b> ) .....               | S7 |

|                                                                                                                                    |     |
|------------------------------------------------------------------------------------------------------------------------------------|-----|
| (2 <i>S</i> ,5 <i>S</i> )-2,5-Bis[ <i>N</i> -methyl- <i>N</i> -hexylamino]carbonyl]-1-(pyridin-4-yl)pyrrolidine ( <b>15</b> )..... | S7  |
| (2 <i>S</i> ,5 <i>S</i> )-Dihexyl 1-(pyridin-4-yl)pyrrolidine-2,5-dicarboxylate ( <b>16</b> ).....                                 | S8  |
| 4-Pyridinyl-L-proline 1'-hexyloxyamide ( <b>17</b> ) .....                                                                         | S8  |
| Typical procedure for asymmetric desymmetrization.....                                                                             | S9  |
| 1,3-Cyclohexanediol isobutyrate ( <b>20</b> ).....                                                                                 | S9  |
| Acylation kinetic resolution of racemic- <b>6</b> with catalyst <b>12b</b> .....                                                   | S9  |
| Determination of the absolute configuration of 2,3-butanediol isobutyrate ( <b>23a</b> ).....                                      | S9  |
| 2,3-Butanediol diisobutyrate ( <b>24a</b> ) .....                                                                                  | S10 |
| Conformation search of cat <b>11</b> and <i>meso</i> -1,2-cyclohexanediol .....                                                    | S11 |
| References .....                                                                                                                   | S11 |
| <sup>1</sup> H and <sup>13</sup> C NMR spectra.....                                                                                | S12 |

Some of the results shown are already mentioned in the patent, JP2005132746.

## General

NMR spectra were obtained with a Varian Gemini 200 (<sup>1</sup>H NMR: 200 MHz, <sup>13</sup>C NMR: 50 MHz) or JEOL JMN 400 spectrometer (<sup>1</sup>H NMR: 400 MHz, <sup>13</sup>C NMR: 100 MHz), chemical shifts being given in ppm units (tetramethylsilane or the solvent residual signal for CD<sub>3</sub>OD as internal standard, indicating 0 and 3.30, respectively). IR spectra were recorded with a JASCO FT/IR-300 spectrometer. Specific rotation was measured with a Horiba SEPA-200 automatic digital polarimeter. MS spectra were recorded with a JEOL JMS-DX300 mass spectrometer or JEOL JMS-700 mass spectrometer. TLC analysis and preparative TLC were performed on commercial glass plates bearing a 0.25 mm layer and 0.5 mm layer of Merck Kiesel-gel 60 F<sub>254</sub>, respectively. Silica gel chromatography was carried with Wakogel C-200, Fuji Silysia BW-1277H, or Nacalai Tesque Silica gel 60 (150–325 mesh). Dry solvents (THF, ether, hexane, dichloromethane, and toluene; <50 ppm water contents) were purchased from Kanto Chemical CO., Inc. and used without further treatment.

## List of abbreviations

|       |                                                             |
|-------|-------------------------------------------------------------|
| AcOEt | ethyl acetate                                               |
| DCM   | dichloromethane                                             |
| DMAP  | 4-dimethylaminopyridine                                     |
| DMF   | dimethylformamide                                           |
| EDCI  | 1-ethyl-3-(3-dimethylaminopropyl)carbodiimide hydrochloride |
| HOBt  | 1-hydroxybenzotriazole                                      |
| NMM   | <i>N</i> -methylmorpholine                                  |
| THF   | tetrahydrofuran                                             |

### General procedure for the preparation of $C_2$ -symmetric catalysts

To a solution of (2*S*,5*S*)-1-(pyridin-4-yl)pyrrolidine-2,5-dicarboxylic acid [1] (130 mg, 0.55 mmol) and the corresponding amino acid or amino alcohol (1.6 mmol, 2.9 equiv) in DMF or DCM (10 mL) were added NMM (148  $\mu$ l, 1.6 mmol, 2.9 equiv), EDCI (312 mg, 1.6 mmol, 2.9 equiv) and HOBt (222 mg, 1.6 mmol, 2.9 equiv). After stirring for 24 h, the mixture was evaporated and diluted with EtOAc (200 mL). The organic layer was washed with sat. aq. NaHCO<sub>3</sub>, brine, dried over Na<sub>2</sub>SO<sub>4</sub>, filtered and evaporated in vacuo. The residue was purified by SiO<sub>2</sub> column chromatography or preparative TLC on silica gel, or recrystallization to give the corresponding  $C_2$ -symmetric catalyst.

Preparation of (2*S*,5*S*)-1-(pyridin-4-yl)pyrrolidine-2,5-dicarboxylic acid was previously reported [1].

### (2*S*,5*S*)-2,5-Bis[(2*S*)-3-(1*H*-indol-3-yl)-1-(methoxy)-1-oxopropan-2-ylamino]carbonyl]-1-(pyridin-4-yl)pyrrolidine (**8a**)

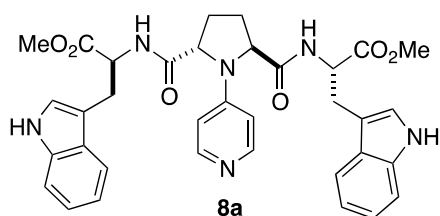

According to the general procedure, **8a** was prepared with (*S*)-tryptophane methyl ester hydrochloride in DMF and purified by SiO<sub>2</sub> column chromatography (AcOEt/MeOH = 5/1) as a white powder in 46% yield.

M.p. 223–225 °C.  $[\alpha]_D^{20} = -26$  (*c* 0.5, DMSO). <sup>1</sup>H NMR (200 MHz, DMSO)  $\delta$  1.65–1.85 (m, 2H), 2.20 (br s, 2H), 3.05 (dd, *J* = 10.6, 14.6 Hz, 1H), 3.24 (dd, *J* = 4.2, 14.6 Hz, 1H), 4.22 (d, *J* = 7.8 Hz, 1H), 4.20–4.60 (m, 1H), 5.78 (d, *J* = 6.0 Hz, 1H), 6.90–7.16 (m, 2H), 7.21 (s, 1H), 7.38 (d, *J* = 8.0 Hz, H), 7.55 (d, *J* = 7.2 Hz, H), 7.74 (d, *J* = 5.0 Hz, 1H), 8.68 (d, *J* = 8.4 Hz, 1H). <sup>13</sup>C NMR (50 MHz, DMSO)  $\delta$  24.3, 26.6, 49.6, 50.4, 58.6, 104.9, 107.3, 109.0, 115.5, 116.0, 118.5, 121.3, 124.5, 133.7, 146.2, 147.5, 169.4, 169.7. IR (KBr) 3255, 1755, 1735, 1655, 1600 cm<sup>-1</sup>. MS (FAB) *m/z* (rel intensity) 659 (MNa<sup>+</sup>), 637 (MH<sup>+</sup>). HRMS (FAB) calcd for C<sub>35</sub>H<sub>37</sub>N<sub>6</sub>O<sub>6</sub> (MH): 637.2775, found, 637.2764. Anal calcd for C<sub>35</sub>H<sub>36</sub>N<sub>6</sub>O<sub>6</sub>: C, 66.03; H, 5.70; N, 13.20. Found C, 65.91; H, 5.79; N, 13.00.

### (2*S*,5*S*)-2,5-Bis[(2*R*)-3-(1*H*-indol-3-yl)-1-(methoxy)-1-oxopropan-2-ylamino]carbonyl]-1-(pyridin-4-yl)pyrrolidine (**8b**)

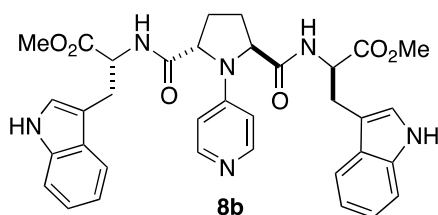

According to the general procedure, **8b** was prepared with (*R*)-tryptophane methyl ester hydrochloride in DMF and purified by SiO<sub>2</sub> column chromatography (AcOEt/MeOH = 5/1)

in 34% yield as a crystalline powder.

M.p. 176–178 °C.  $[\alpha]_D^{20} = -58$  (c 0.5, DMSO).  $^1\text{H}$  NMR (200 MHz,  $\text{CD}_3\text{OD}$ )  $\delta$  1.40–1.70 (m, 2H), 2.03 (br s, 2H), 3.12 (dd,  $J = 9.4, 14.6$  Hz, 2H), 3.20–3.40 (m, 1H), 3.70 (s, 6H), 4.29 (d,  $J = 7.8$  Hz, 2H), 4.75 (dd,  $J = 4.8, 9.2$ , 2H), 6.28 (d,  $J = 6.8$  Hz, 2H), 6.80–7.20 (m, 8H), 7.33 (d,  $J = 8.0$  Hz, 2H), 7.45 (d,  $J = 7.4$  Hz, 2H), 7.93 (d,  $J = 6.8$  Hz, 2H).  $^{13}\text{C}$  NMR (50 MHz,  $\text{CD}_3\text{OD}$ )  $\delta$  26.2, 28.4, 51.0, 52.5, 61.6, 107.9, 108.7, 110.5, 117.1, 118.0, 120.6, 122.4, 126.6, 136.1, 144.9, 151.7, 171.7, 172.0. IR (KBr) 3380, 3260, 1740, 1665, 1600  $\text{cm}^{-1}$ . MS (FAB)  $m/z$  (rel intensity) 637 ( $\text{MH}^+$ ). HRMS (FAB) calcd for  $\text{C}_{35}\text{H}_{37}\text{O}_6\text{N}_4$  (MH): 637.2775, found, 637.2748.

**(2S,5S)-2,5-Bis[tryptamino]carbonyl-1-(pyridin-4-yl)pyrrolidine (9)**

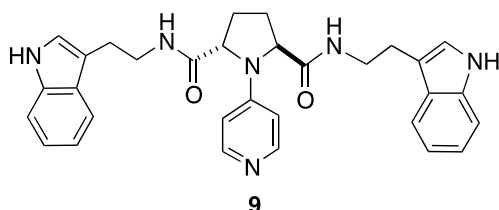

According to the general procedure, **9** was prepared with tryptamin hydrochloride in DMF and purified by  $\text{SiO}_2$  column chromatography (AcOEt/MeOH = 5/1) in 40% yield as a crystalline powder.

M.p. 140–145 °C.  $[\alpha]_D^{20} = -36$  (c 0.5 MeOH).  $^1\text{H}$  NMR (200 MHz,  $\text{CD}_3\text{OD}$ )  $\delta$  1.70–1.90 (m, 2H), 2.10–2.40 (m, 2H), 2.91 (t,  $J = 7.6$  Hz, 4H), 3.49 (dd,  $J = 7.0$  Hz, 4H), 4.31 (d,  $J = 7.6$  Hz, 2H), 6.16 (d,  $J = 6.6$  Hz, 2H), 6.90–7.20 (m, 6H), 7.30–7.40 (m, 2H), 7.42–7.60 (m, 2H), 7.85 (d, 6.6, 2H).  $^{13}\text{C}$  NMR (50 MHz,  $\text{CD}_3\text{OD}$ )  $\delta$  24.1, 28.7, 39.2, 61.8, 107.6, 110.4, 111.0, 117.4, 117.8, 120.5, 121.7, 126.9, 136.2, 147.3, 150.7, 172.4. IR (KBr) 3240, 1660, 1600, 1518  $\text{cm}^{-1}$ . MS (FAB)  $m/z$  (rel intensity) 521 ( $\text{MH}^+$ ). HRMS (FAB) calcd for  $\text{C}_{31}\text{H}_{32}\text{O}_2\text{N}_6$  (MH): 521.2665, found, 521.2657.

**(2S,5S)-2,5-Bis[(2S)-3-(1-(methoxy)-1-oxoethan-2-ylamino)carbonyl]-1-(pyridin-4-yl)pyrrolidine (10)**

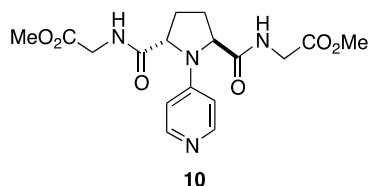

According to the general procedure, **10** was prepared with glycine methyl ester hydrochloride in 16% yield as a white powder.

M.p. 222–225 °C.  $[\alpha]_D^{20} = -76$  (c 0.25,  $\text{CH}_3\text{OH}$ ).  $^1\text{H}$  NMR (200 MHz,  $\text{CD}_3\text{OD}$ )  $\delta$  2.10–2.30 (m, 2H), 2.42–2.33 (m, 2H), 3.73 (s, 6H), 3.96 (d,  $J = 6.2$  Hz, 4H), 4.59 (d,  $J = 8.2$  Hz, 2H), 6.56 (d,  $J = 6.4$  Hz, 2H), 8.14 (d,  $J = 6.4$  Hz, 2H).  $^{13}\text{C}$  NMR (50 MHz,  $\text{CD}_3\text{OD}$ )  $\delta$  28.7, 39.9, 50.7, 61.7, 108.1, 147.2, 150.8, 169.5, 173.4. IR (KBr) 3245, 1742, 1642, 1600, 1542, 1519  $\text{cm}^{-1}$ . MS (FAB)  $m/z$  (rel intensity) 401 ( $\text{MNa}^+$ , 12), 379 ( $\text{MH}^+$ , 100), 262 (30). HRMS (FAB) calcd for  $\text{C}_{17}\text{H}_{23}\text{O}_6\text{N}_4$  (MH): 379.1618, found, 379.1598.

**(2*S*,5*S*)-2,5-Bis[hexylamino]carbonyl-1-(pyridin-4-yl)pyrrolidine (11)**

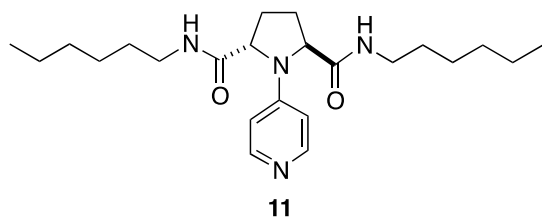

According to the general procedure, **11** was prepared with *n*-hexylamine in DCM, purified by repeated preparative TLC (SiO<sub>2</sub>, EtOAc/MeOH = 3 : 1 and CHCl<sub>3</sub>/MeOH = 5 : 1) and recrystallization from EtOAc-CH<sub>2</sub>Cl<sub>2</sub> to afford **11** in 54% yield as a colorless powder.

M.p. 222–223 °C.  $[\alpha]_D^{20} = -86$  (c 0.5, CHCl<sub>3</sub>). <sup>1</sup>H NMR (200 MHz, CDCl<sub>3</sub>) δ 0.85 (t, *J* = 6.8 Hz, 6H), 1.10–1.35 (m, 12H), 1.35–1.50 (m, 4H), 2.10–2.30 (m, 2H), 2.30–2.60 (m, 2H), 3.10–3.40 (m, 4H), 4.42 (d, *J* = 7.6 Hz, 2H), 6.30–6.60 (m, 4H), 8.13 (dd, *J* = 1.4, 5.0 Hz, 2H). <sup>13</sup>C NMR (50 MHz, CDCl<sub>3</sub>) δ 14.1, 22.7, 26.7, 29.6, 30.1, 31.6, 39.7, 62.4, 108.3, 149.0, 150.5, 172.3. IR (KBr) 3288, 2928, 1651, 1596, 1552, 1510 cm<sup>-1</sup>. MS (FAB) *m/z* (rel intensity) 402 (M, 3), 274 (100), 145 (60). HRMS (FAB) calcd for C<sub>23</sub>H<sub>38</sub>O<sub>2</sub>N<sub>4</sub> (M<sup>+</sup>) 402.2995, found, 402.2974. Anal calcd for C<sub>23</sub>H<sub>38</sub>N<sub>2</sub>O<sub>4</sub>: C, 68.62; H, 9.51; N, 13.92. Found C, 68.35; H, 9.40; N, 13.93.

**(2*S*,5*S*)-2,5-Bis[(2*S*)-3-(2-naphthylmethyl)-1-(methoxy)-1-oxopropan-2-ylamino]carbonyl-1-(pyridin-4-yl)pyrrolidine (12a)**

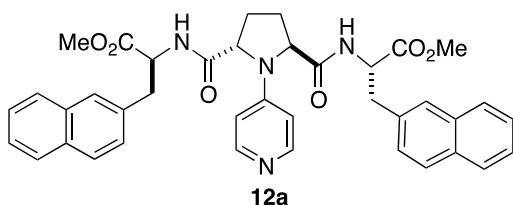

According to the general procedure, **12a** was prepared with (*S*)-naphthylalanine methyl ester hydrochloride in DMF in 41% yield as a white powder.

M.p. 225–228 °C.  $[\alpha]_D^{20} = +39$  (c 0.25, MeOH). <sup>1</sup>H NMR (200 MHz, DMSO) δ 1.50–1.65 (m, 2H), 2.09 (br s, 2H), 3.05 (t, *J* = 13.0 Hz, 2H), 3.20–3.50 (m, 2H), 3.63 (s, 6H), 4.10 (d, *J* = 7.2 Hz, 2H), 4.50–4.65 (m, 2H), 5.53 (d, *J* = 6.2 Hz, 2H), 7.10 (d, *J* = 5.8 Hz, 2H), 7.38–7.60 (m, 6H), 7.70–8.00 (m, 8H), 8.66 (d, *J* = 8.4 Hz, 2H). <sup>13</sup>C NMR (50 MHz, DMSO) δ 29.6, 37.1, 52.9, 53.7, 61.9, 108.0, 126.34, 126.8, 128.1, 128.3, 128.4, 132.6, 133.6, 135.9, 149.2, 150.4, 172.4, 172.5. IR (KBr) 3255, 1750, 1650, 1600 cm<sup>-1</sup>. MS (FAB) *m/z* (rel intensity) 659 (MH<sup>+</sup>). HRMS (FAB) calcd for C<sub>39</sub>H<sub>39</sub>O<sub>6</sub>N<sub>4</sub> (MH): 659.2869, found, 659.2859.

**(2*S*,5*S*)-2,5-Bis[(2*R*)-3-(2-naphthylmethyl)-1-(methoxy)-1-oxopropan-2-ylamino]carbonyl]-1-(pyridin-4-yl)pyrrolidine (12b)**

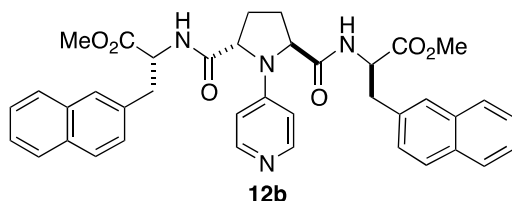

According to the general procedure, **12b** was prepared with (*R*)-naphthylalanine methyl ester hydrochloride in DMF and purified by SiO<sub>2</sub> column chromatography (SiO<sub>2</sub>, AcOEt /MeOH = 4/1) in 53% yield as an amorphous powder.

M.p. 191–193 °C.  $[\alpha]_D^{20} = -90$  (c 0.5, MeOH). <sup>1</sup>H NMR (200 MHz, CD<sub>3</sub>OD) δ 1.20–1.50 (m, 2 H), 1.87 (br s, 2 H), 3.05 (dd, *J* = 10.8, 13.9 Hz, 2 H), 3.41 (dd, *J* = 4.4, 13.9 Hz, 2H), 3.73 (s, 6H), 4.26 (d, *J* = 7.6 Hz, 2H), 4.83 (dd, *J* = 4.6, 10.8 Hz, 2H), 6.18 (d, *J* = 6.6 Hz, 2H), 7.25 (dd, *J* = 1.6, 8.4 Hz, 2H), 7.40–7.60 (m, 6H), 7.60–7.90 (m, 8H). <sup>13</sup>C NMR (100 MHz, CD<sub>3</sub>OD) δ 28.4, 36.2, 51.1, 52.6, 61.4, 107.7, 124.9, 125.3, 126.2, 126.6, 126.7, 126.8, 127.2, 131.89, 132.9, 133.8, 146.7, 150.7, 171.3, 172.4. IR (KBr) 3280, 1740, 1657, 1600 cm<sup>-1</sup>. MS *m/z* (FAB) (rel intensity) 659 (MH<sup>+</sup>). HRMS (FAB) calcd for C<sub>39</sub>H<sub>39</sub>O<sub>6</sub>N<sub>4</sub> (MH): 659.2869, found, 659.2859.

**(2*S*,5*S*)-2,5-Bis[(2*S*)-3-(isopropyl)-1-(methoxy)-1-oxopropan-2-ylamino]carbonyl]-1-(pyridin-4-yl)pyrrolidine (13)**

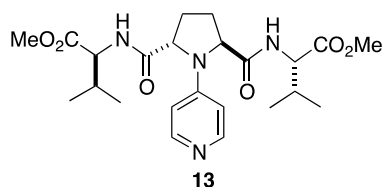

According to the general procedure, **13** was prepared with (*S*)-valine methyl ester hydrochloride in CH<sub>2</sub>Cl<sub>2</sub> with preparative TLC (SiO<sub>2</sub>, AcOEt /MeOH = 3/1) in 29% yield as a white powder.

M.p. 203–205 °C.  $[\alpha]_D^{21} = -117$  (c 0.5, MeOH). <sup>1</sup>H NMR (200 MHz, CD<sub>3</sub>OD) δ 0.99–1.10 (m, 12H), 2.07–2.35 (m, 4H), 2.40–2.60 (m, 2H), 3.73 (s, 6H), 4.37 (d, *J* = 5.6 Hz, 2H), 4.66 (d, *J* = 7.6 Hz, 2H), 6.47 (d, *J* = 6.4 Hz, 2H), 8.09 (d, *J* = 6.4 Hz, 2H). <sup>13</sup>C NMR (50 MHz, CD<sub>3</sub>OD) δ 16.7, 17.8, 28.7, 29.7, 50.6, 57.4, 61.2, 107.5, 147.3, 151.0, 171.3, 173.1. IR (KBr) 3255, 2880, 1740, 1655, 1600 cm<sup>-1</sup>. MS (FAB) *m/z* (rel intensity) 462 (M, 7), 304 (55), 71 (100). HRMS (FAB) Calcd for C<sub>23</sub>H<sub>34</sub>O<sub>6</sub>N<sub>4</sub> (M): 462.2478, found, 462.2490.

**(2*S*,5*S*)-2,5-Bis[(2*S*)-3-(isobutyl)-1-(methoxy)-1-oxopropan-2-ylamino]-carbonyl-1-(pyridin-4-yl)pyrrolidine (**14**)**

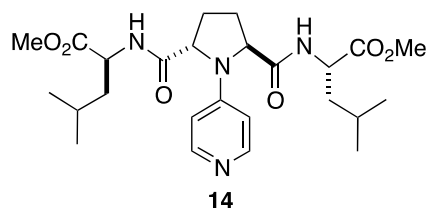

According to the general procedure, **14** was prepared with (*S*)-leucine methyl ester hydrochloride in CH<sub>2</sub>Cl<sub>2</sub> with SiO<sub>2</sub> column chromatography (CHCl<sub>3</sub>/MeOH = 6/1) and successive preparative TLC (SiO<sub>2</sub>, CHCl<sub>3</sub>/MeOH = 6/1) in 71% yield as a white powder.

M.p. 187–189 °C.  $[\alpha]_D^{20} = -133$  (c 0.5, CH<sub>3</sub>OH). <sup>1</sup>H NMR (200 MHz, CD<sub>3</sub>OD)  $\delta$  0.93 (d, *J* = 5.8 Hz, 6H), 1.02 (d, *J* = 6.2 Hz, 6H), 1.50–1.90 (m, 4H), 2.10–2.30 (m, 2H), 2.35–2.60 (m, 2H), 3.70 (s, 6H), 4.20–4.60 (m, 4H), 6.46 (d, *J* = 5.5 Hz, 2H), 8.10 (d, *J* = 5.5 Hz, 2H). <sup>13</sup>C NMR (50 MHz, CD<sub>3</sub>OD)  $\delta$  19.6, 21.6, 24.4, 28.6, 39.1, 50.2, 50.8, 61.4, 107.7, 147.1, 151.0, 172.2, 172.93. IR (KBr) 2880, 1745, 1660, 1600, 1545, 1518 cm<sup>-1</sup>. MS (FAB) *m/z* (rel intensity) 490 (M, 4), 318 (100), 145 (40). HRMS (FAB) calcd for C<sub>25</sub>H<sub>38</sub>O<sub>6</sub>N<sub>4</sub> (M): 490.2791, found, 490.2796.

**(2*S*,5*S*)-2,5-Bis[*N*-methyl-*N*-hexylamino]carbonyl-1-(pyridin-4-yl)pyrrolidine (**15**)**

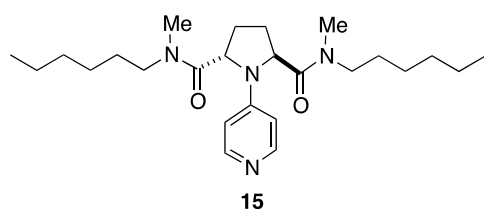

According to the general procedure, **15** was prepared with *N*-methyl hexylamine in CH<sub>2</sub>Cl<sub>2</sub> without addition of NMM and purified by preparative TLC (SiO<sub>2</sub>, CHCl<sub>3</sub>/MeOH = 5/1) in 42% yield as a white solid.

Decomposition.  $[\alpha]_D^{20} = -28$  (c 0.5, CHCl<sub>3</sub>). <sup>1</sup>H NMR (400 MHz, DMSO, 150 °C)  $\delta$  0.90 (t, *J* = 6.8 Hz, 6H), 1.20–1.40 (m, 12H), 1.45–1.65 (m, 4H), 1.80–1.95 (m, 2H), 2.40–3.15 (m, 2H), 3.04 (m, 6H), 3.38 (t, *J* = 6.8 Hz, 4H), 4.81 (d, *J* = 7.8 Hz, 2H), 6.12 (d, *J* = 6.2 Hz, 2H), 8.02 (d, *J* = 6.2 Hz, 2H). <sup>13</sup>C NMR (50 MHz, CDCl<sub>3</sub>)  $\delta$  14.1, 22.7, 26.6, 26.8, 27.2, 28.5, 28.8, 29.2, 31.6, 33.9, 35.0, 48.4, 49.8, 59.2, 107.7, 149.6, 150.4, 171.1, 171.4. IR (KBr) 2931, 1650, 1603, 1513 cm<sup>-1</sup>. MS (FAB) *m/z* (rel intensity) 430 (M, 4), 402 (2), 288 (92), 145 (100). HRMS (FAB) calcd for C<sub>25</sub>H<sub>42</sub>O<sub>2</sub>N<sub>4</sub> (M): 430.3307, found, 430.3311.

**(2*S*,5*S*)-Dihexyl 1-(pyridin-4-yl)pyrrolidine-2,5-dicarboxylate (**16**)**

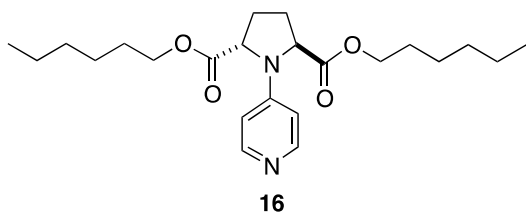

According to the general procedure, **16** was prepared with *n*-hexanol in CH<sub>2</sub>Cl<sub>2</sub> without addition of NMM and purified by preparative TLC (SiO<sub>2</sub>, Et<sub>2</sub>O/MeOH = 10/1) in 38 % yield as a colorless oil.

$[\alpha]_D^{20} = -77$  (c 0.25, CHCl<sub>3</sub>). <sup>1</sup>H NMR (200 MHz, CDCl<sub>3</sub>)  $\delta$  0.88 (t, *J* = 6.6 Hz, 6H), 1.00–1.43 (m, 12 H), 1.43–1.70 (m, 4H), 2.10–2.30 (m, 2H), 2.40–2.65 (m, 2H), 4.00–4.20 (m, 4H), 4.48 (d, *J* = 8.2 Hz, 2H), 6.33 (dd, *J* = 1.6, 4.8 Hz, 2H), 8.24 (dd, *J* = 1.4, 4.8 Hz, 2H). <sup>13</sup>C NMR (50 MHz, CDCl<sub>3</sub>)  $\delta$  14.1, 22.6, 25.6, 28.7, 29.1, 31.4, 60.9, 65.7, 107.8, 150.0, 150.4, 172.7. IR (film) 2956, 2858, 1743, 1595, 1510 cm<sup>-1</sup>. MS (FAB) *m/z* (rel intensity) 404 (M, 7), 275 (100), 191 (12), 145 (30). HRMS (FAB) calcd for C<sub>23</sub>H<sub>36</sub>O<sub>4</sub>N<sub>2</sub> (M): 404.2675, found, 404.2673.

**4-Pyridinyl-L-proline 1'-hexylamide (**17**)**

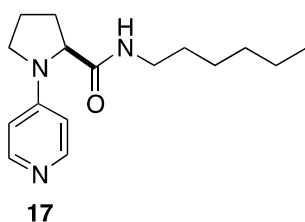

To a solution of *n*-hexylamine (87  $\mu$ L, 0.66 mmol), *N*-(4-pyridyl)-L-proline hydrochloride (100 mg, 0.44 mmol) in DCM (10 mL) were added NMM (48  $\mu$ L, 0.44 mmol), EDCI (125 mg, 0.66 mmol) and HOBt (89 mg, 0.66 mmol). After stirring for 24 h, the mixture was evaporated and diluted with EtOAc (200 mL). The organic layer was washed with sat. aq. NaHCO<sub>3</sub> (10 mL), brine (10 mL), dried over Na<sub>2</sub>SO<sub>4</sub>, filtered and evaporated in vacuo. The residue was purified by preparative TLC (SiO<sub>2</sub>, CHCl<sub>3</sub>/MeOH = 5/1) to give **17** (41 mg, 34%) as colorless needles.

M.p. 45 °C.  $[\alpha]_D^{20} -110$  (c 0.5, CHCl<sub>3</sub>). <sup>1</sup>H NMR (200 MHz, CDCl<sub>3</sub>)  $\delta$  0.85 (t, *J* = 6.4 Hz, 3 H), 1.10–1.35 (m, 6 H), 1.42 (t, *J* = 6.6 Hz, 2 H), 1.90–2.20 (m, 2 H), 2.20–2.50 (m, 2 H), 3.17–3.40 (m, 3 H), 3.50–3.80 (m, 1 H), 4.10 (t, *J* = 5.4 Hz, 1 H), 6.24 (br s, 1 H), 6.46 (d, *J* = 5.9 Hz, 2H), 8.27 (d, *J* = 5.9 Hz, 2H). <sup>13</sup>C NMR (50 MHz, NMR (CDCl<sub>3</sub>)  $\delta$  14.1, 22.6, 24.0, 26.6, 29.7, 31.4, 31.5, 39.5, 48.9, 63.5, 108.2, 150.0, 152.1, 172.0. IR (KBr) 3299, 2928, 1650, 1602, 1551, 1518 cm<sup>-1</sup>. MS (FAB) *m/z* (rel intensity) 275 (M<sup>+</sup>, 42), 147 (100), 105 (40), 78 (38). HRMS (FAB) Calcd for C<sub>16</sub>H<sub>25</sub>ON<sub>3</sub> 275.1998, found 275.1999.



### Typical procedure for asymmetric desymmetrization

To a solution of substrate (0.1 mmol), catalyst (5 mol %) and 2,4,6-collidine (0.14 mmol, 18.5  $\mu$ L) in solvent (0.5 mL), isobutyric anhydride (0.13 mmol, 21.5  $\mu$ L) was added. After the mixture was stirred, it was diluted with EtOAc and washed with 1 M aq. HCl, sat. aq. NaHCO<sub>3</sub> and brine. The organic layer was dried over Na<sub>2</sub>SO<sub>4</sub>, filtered and evaporated in vacuo. Yields of monoacylate, diacylate and recovered substrate were determined by <sup>1</sup>H NMR integration with dibenzyl ether as an internal standard.

Enantiomeric purities of 1,2- and 1,3-cyclohexanediol monoisobutyrate were determined by GLC analysis with beta-DEX 225 at 150 °C (Tables 1–5 in the manuscript).

Enantiomeric purities of *cis*-2,3-butanediol isobutyrate (**23a**) and hydrobenzoin isobutyrate (**23b**) were determined by GLC analysis with beta-DEX 225 at 90 °C and HPLC analysis with chiral stationary phase [column: CHIRALCEL OJ (4.6 mm x 25 cm), eluent: hexane-*i*PrOH (95:5), flow rate: 0.5 mL/min], respectively (Table 6 in the main manuscript).

### 1,3-Cyclohexanediol isobutyrate (**20**)

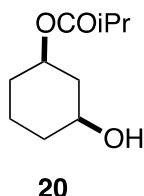

<sup>1</sup>H-NMR (400 MHz, CDCl<sub>3</sub>)  $\delta$ : 4.65–4.54 (m, 1H), 3.61–3.50 (m, 1H), 3.28 (br s, 1H), 2.40 (sept, *J* = 7.1 Hz, 1H), 2.15–2.07 (m, 1H), 1.85–1.74 (m, 2H), 1.74–1.64 (m, 1H), 1.31–0.99 (m, 4H), 1.04 (d, *J* = 6.9 Hz, 6H). <sup>13</sup>C-NMR (100 MHz, CDCl<sub>3</sub>)  $\delta$ : 176.5, 70.6, 68.1, 40.4, 34.0, 33.9, 30.4, 19.9, 18.7. IR (neat) 3400, 2880, 2875, 2835, 1730, 1718 cm<sup>-1</sup>; MS (EI) *m/z* (rel intensity) 186 (M<sup>+</sup>, 0.15), 168 (5), 125 (10), 98 (80), 81 (100); HRMS (EI) calcd for C<sub>10</sub>H<sub>18</sub>O<sub>3</sub> (M<sup>+</sup>), 186.1256, found 186.1248.

### Acylative kinetic resolution of racemic-**6** with catalyst **12b**

To a solution of racemic-**6** (18.6 mg, 0.1 mmol), catalyst **12b** (3.3 mg, 5 mol%) and 2,4,6-collidine (13.2  $\mu$ L, 0.1 mmol) in CDCl<sub>3</sub> (0.7 mL), isobutyric anhydride (11.6  $\mu$ L, 0.07 mmol) was added at 20 °C. After the mixture was stirred at 20 °C for 23 h, conversion of **6** was determined by <sup>1</sup>H NMR integration with dibenzyl ether as an internal standard. Then, the mixture was diluted with EtOAc and washed with 1 M aq. HCl, sat. aq. NaHCO<sub>3</sub>, and brine. The organic layer was dried over Na<sub>2</sub>SO<sub>4</sub>, filtered and evaporated in vacuo. Enantiomeric purity of (1*R*,2*S*)-**6** (67% ee) was determined by GLC analysis with beta-DEX 225 at 150 °C.

### Determination of the absolute configuration of 2,3-butanediol isobutyrate (**23a**)

Asymmetric desymmetrization of 2,3-butanediol (**22a**) with benzoic anhydride in the presence of cat. **11**, according to the general procedure, afforded the monobenzoate (**S1**) in 50% ee in 39% yield (HPLC conditions: CHIRALPAK AD, *n*-hexane/2-propanol = 97:3, flow rate: 0.2 mL/min, *t*<sub>R</sub> = 33 min, 37 min, Scheme I). The absolute configuration of **S1** was

determined to be (2*R*,3*S*) by comparison with the optical rotation of the literature data [2]. Monobenzoate (**S1**) was further converted to (2*R*,3*S*)-**S2**  $[\alpha]_{\text{D}}^{21} -13.8$  (*c* 1.0, CHCl<sub>3</sub>). On the other hand, 2,3-butanediol isobutyrate (**23a**) obtained in Table 5 was converted to the corresponding benzoate (**S2**), which was assigned to be (2*S*,3*R*) by comparison of the optical rotation of **S2** from Scheme I. Thus, the absolute configuration of **23a** was determined to be (2*R*,3*S*).

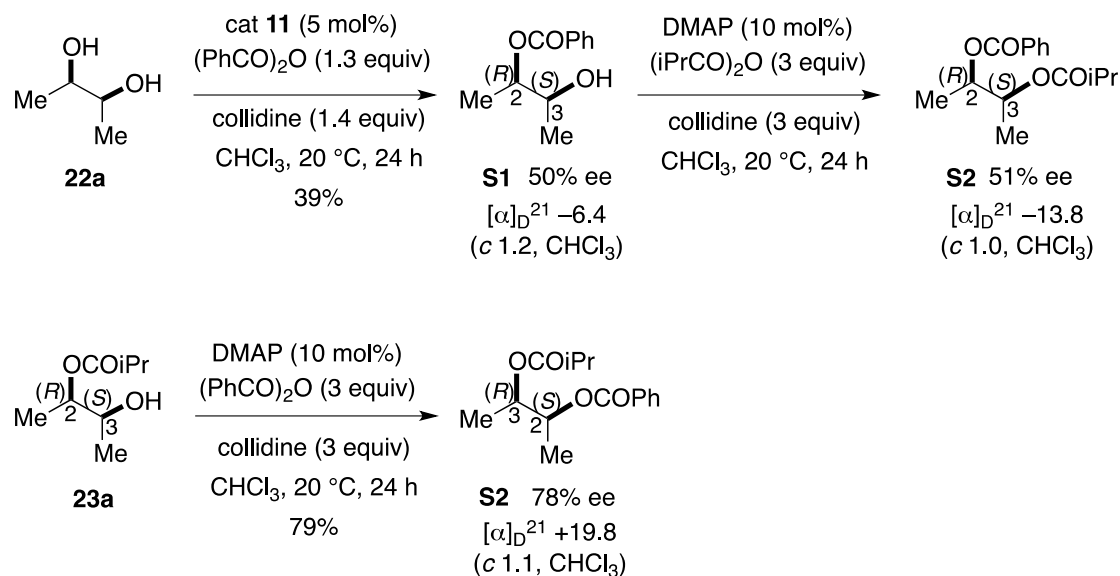

#### *cis*-2,3-Butanediol diisobutyrate (**24a**)

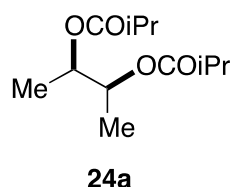

<sup>1</sup>H NMR (200 MHz, CDCl<sub>3</sub>)  $\delta$  1.00–1.17 (m, 12H), 1.18 (d, *J* = 5.4 Hz, 6H), 2.40–2.62 (m, 2H), 4.90–5.10 (m, 2H). <sup>13</sup>C-NMR (100 MHz, CDCl<sub>3</sub>)  $\delta$ : 176.1, 70.8, 34.0, 18.9, 18.7, 14.9. IR (film) 2890, 2870, 2840, 1730 cm<sup>-1</sup>. MS *m/z* (rel intensity) 230 (M, 0.03), 215 (2), 142 (70), 115 (72), 89 (68), 71 (100), 55 (58). HRMS calcd for C<sub>12</sub>H<sub>22</sub>O<sub>4</sub> 230.1518, found 230.1521. HRMS calcd for C<sub>11</sub>H<sub>19</sub>O<sub>4</sub> (M–CH<sub>3</sub>) 215.1284, found 215.1287.

### Conformation search of catalyst **11**.

The most stable conformer of **11** was generated by a molecular modeling search with AMBER\* force field with the GB/SA solvation model for chloroform using MacroModel V 9.0 (50,000 steps MCMM). Stereoview of the most stable conformation was shown below.

(a) side view

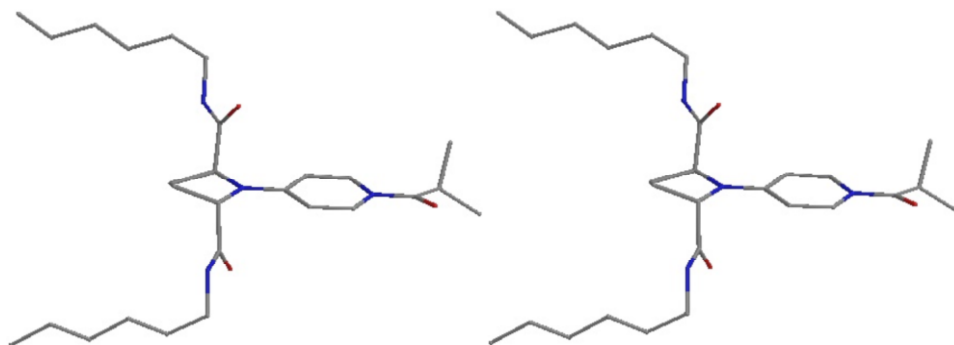

(b) front view

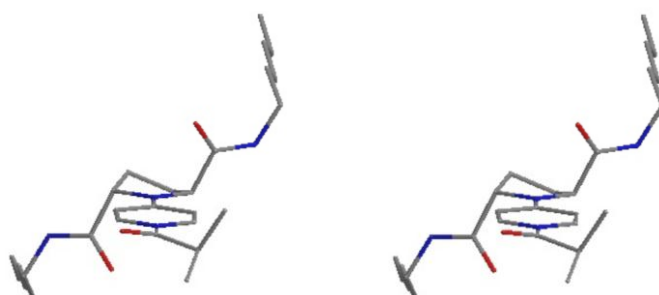

### References

1. Kawabata, T.; Muramatsu, W.; Nishio, T.; Shibata, T.; Schedel, H. *J. Am. Chem. Soc.*, **2007**, *129*, 12890.
2. Mazet, C.; Köhler, V.; Pfaltz, A. *Angew. Chem. Int. Ed.* **2005**, *44*, 4888.

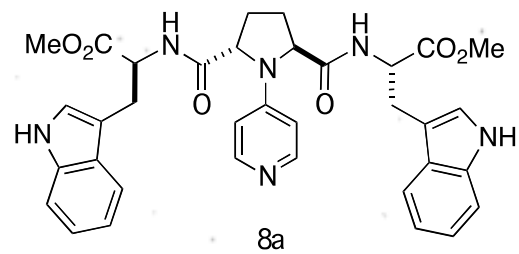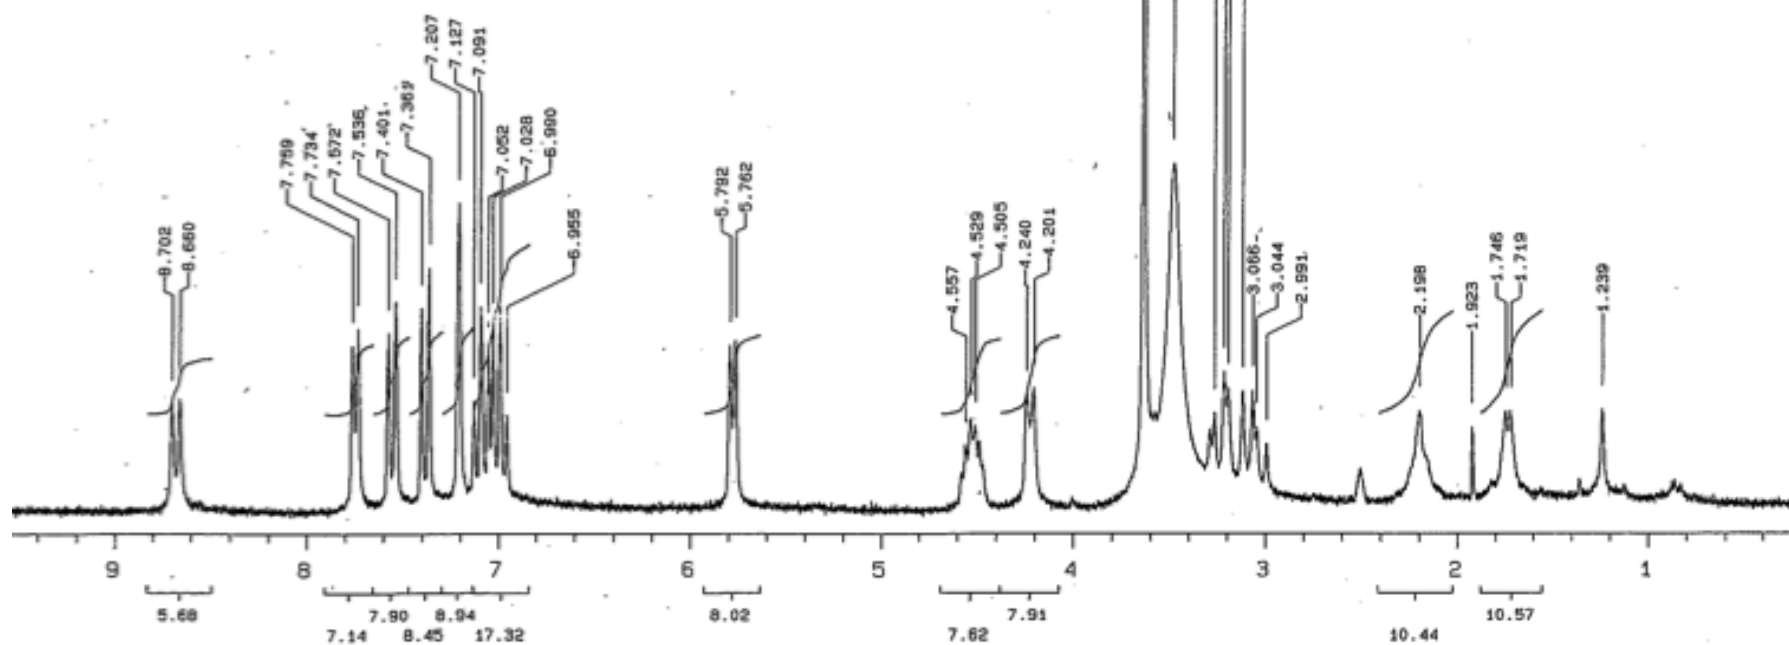

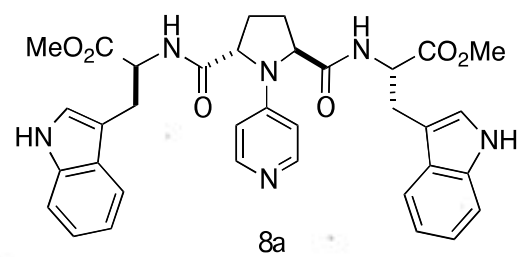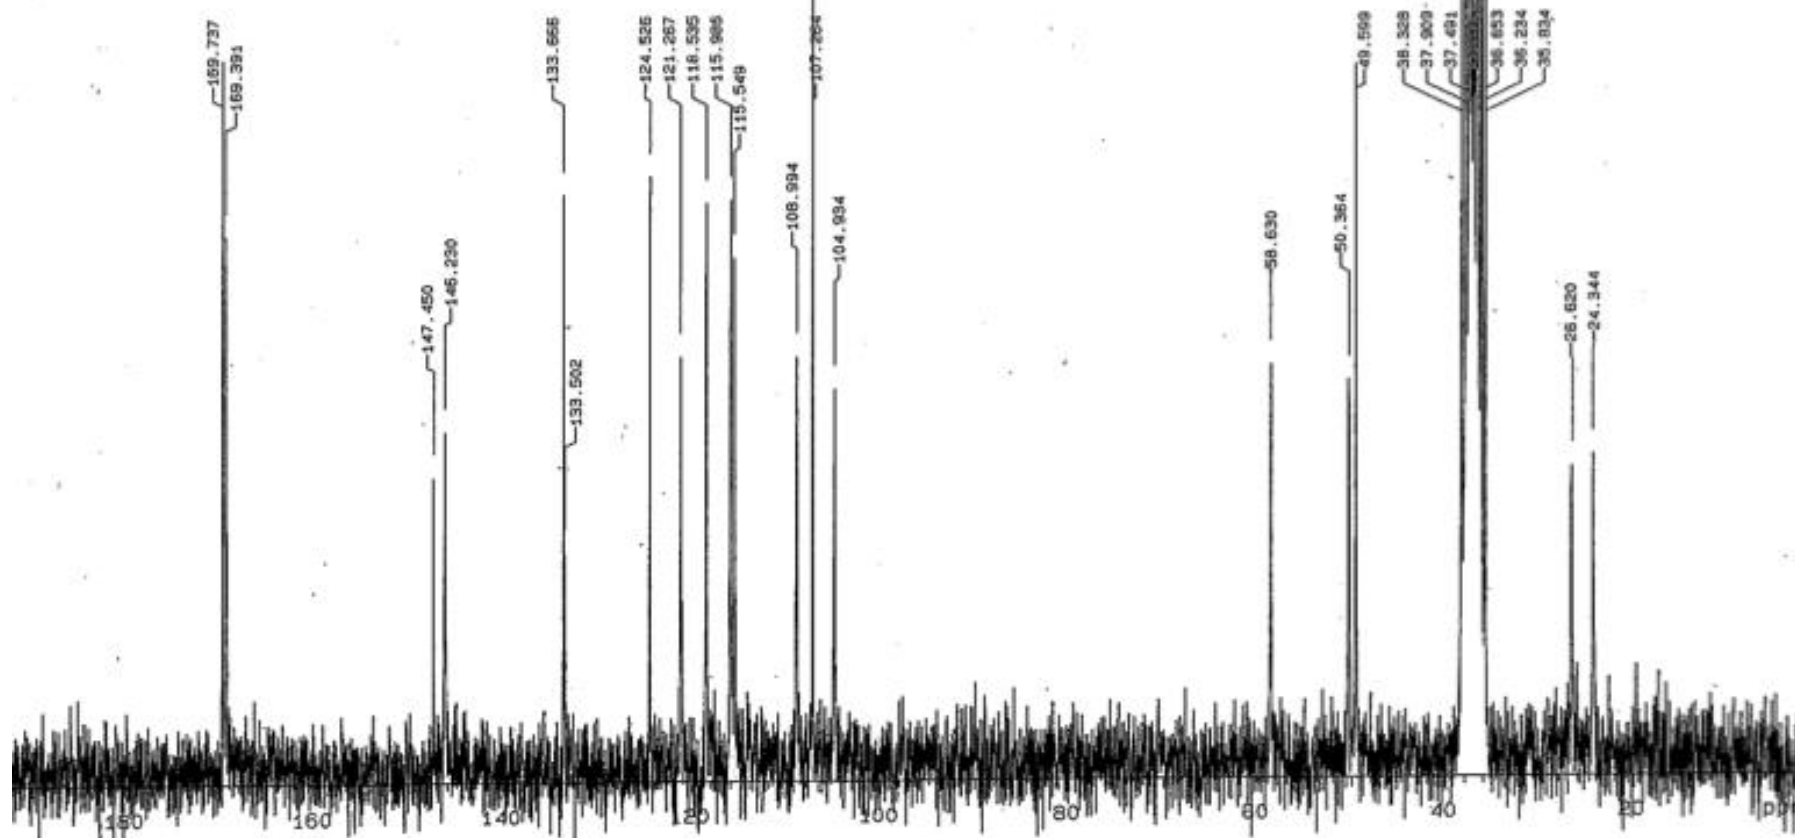

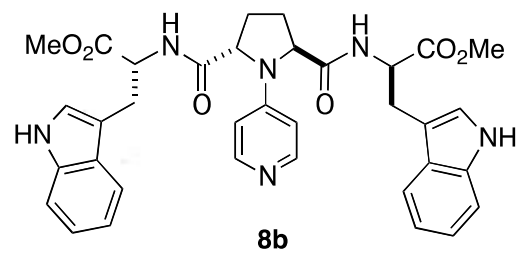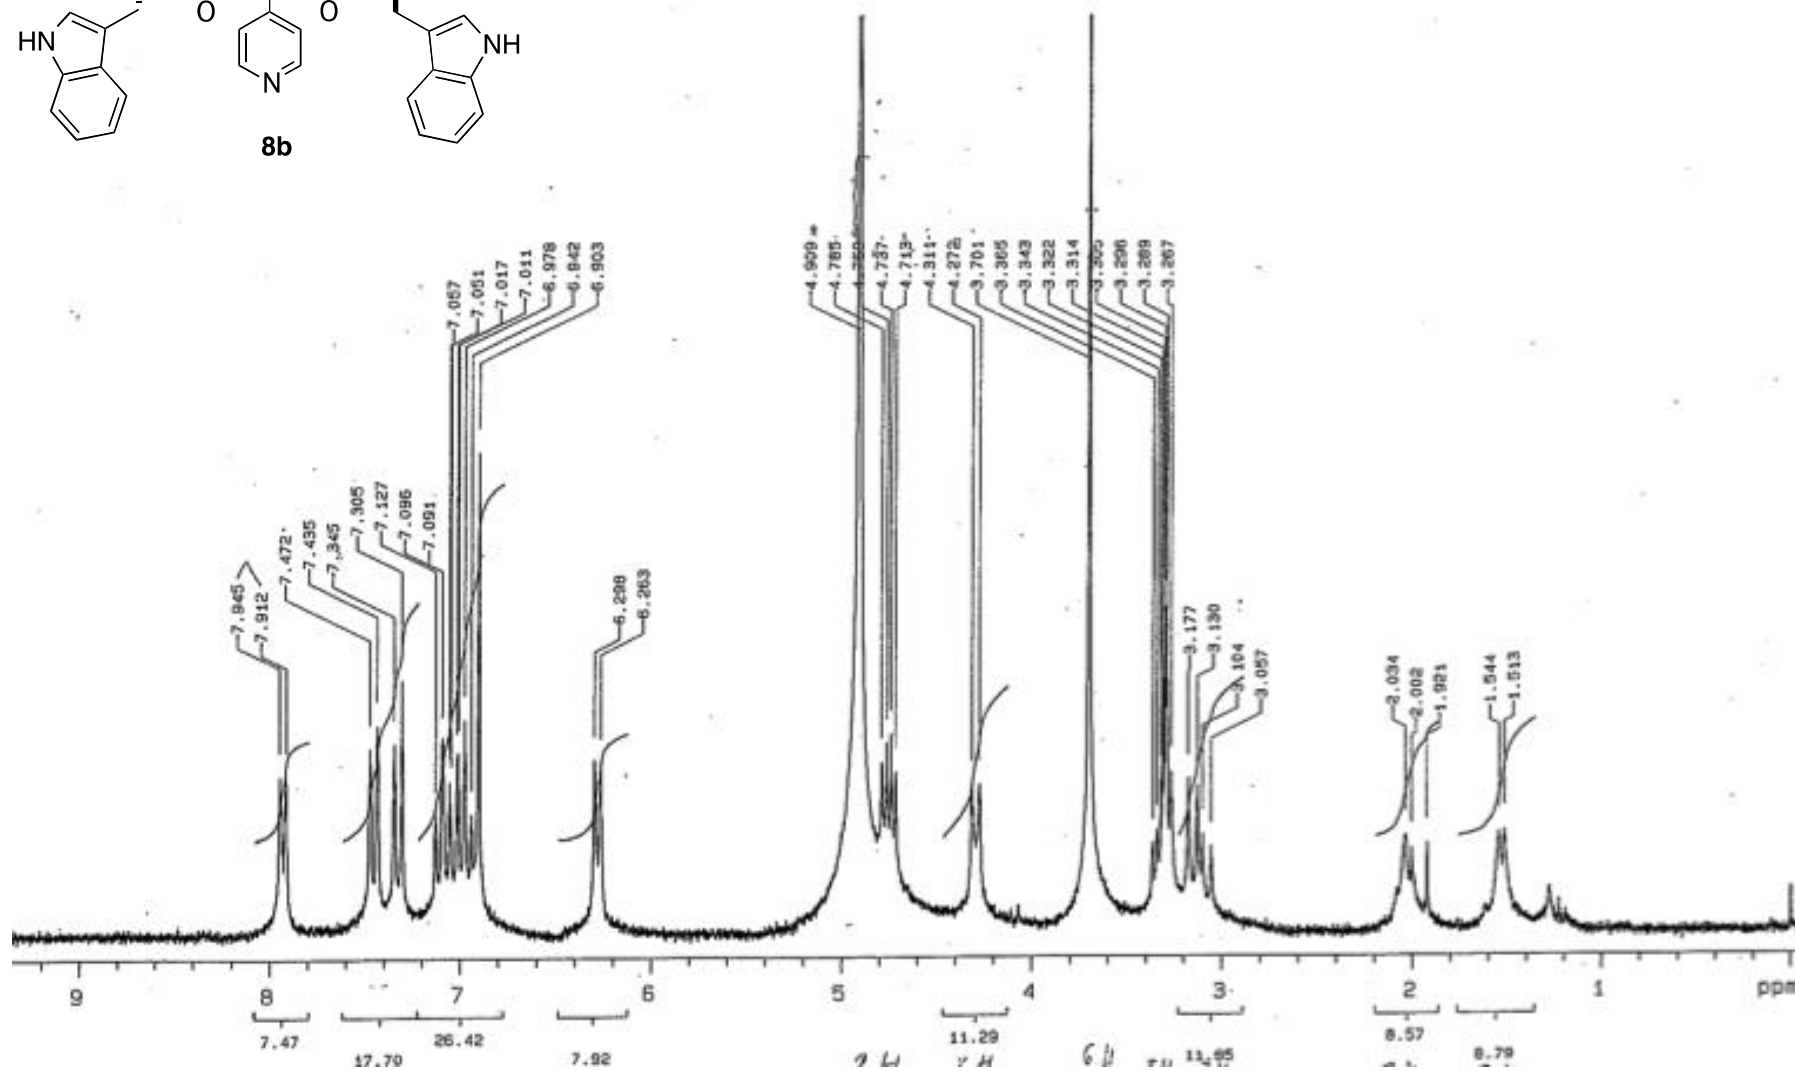

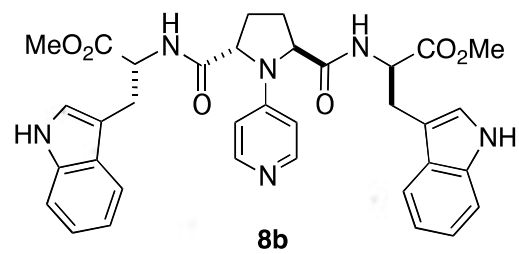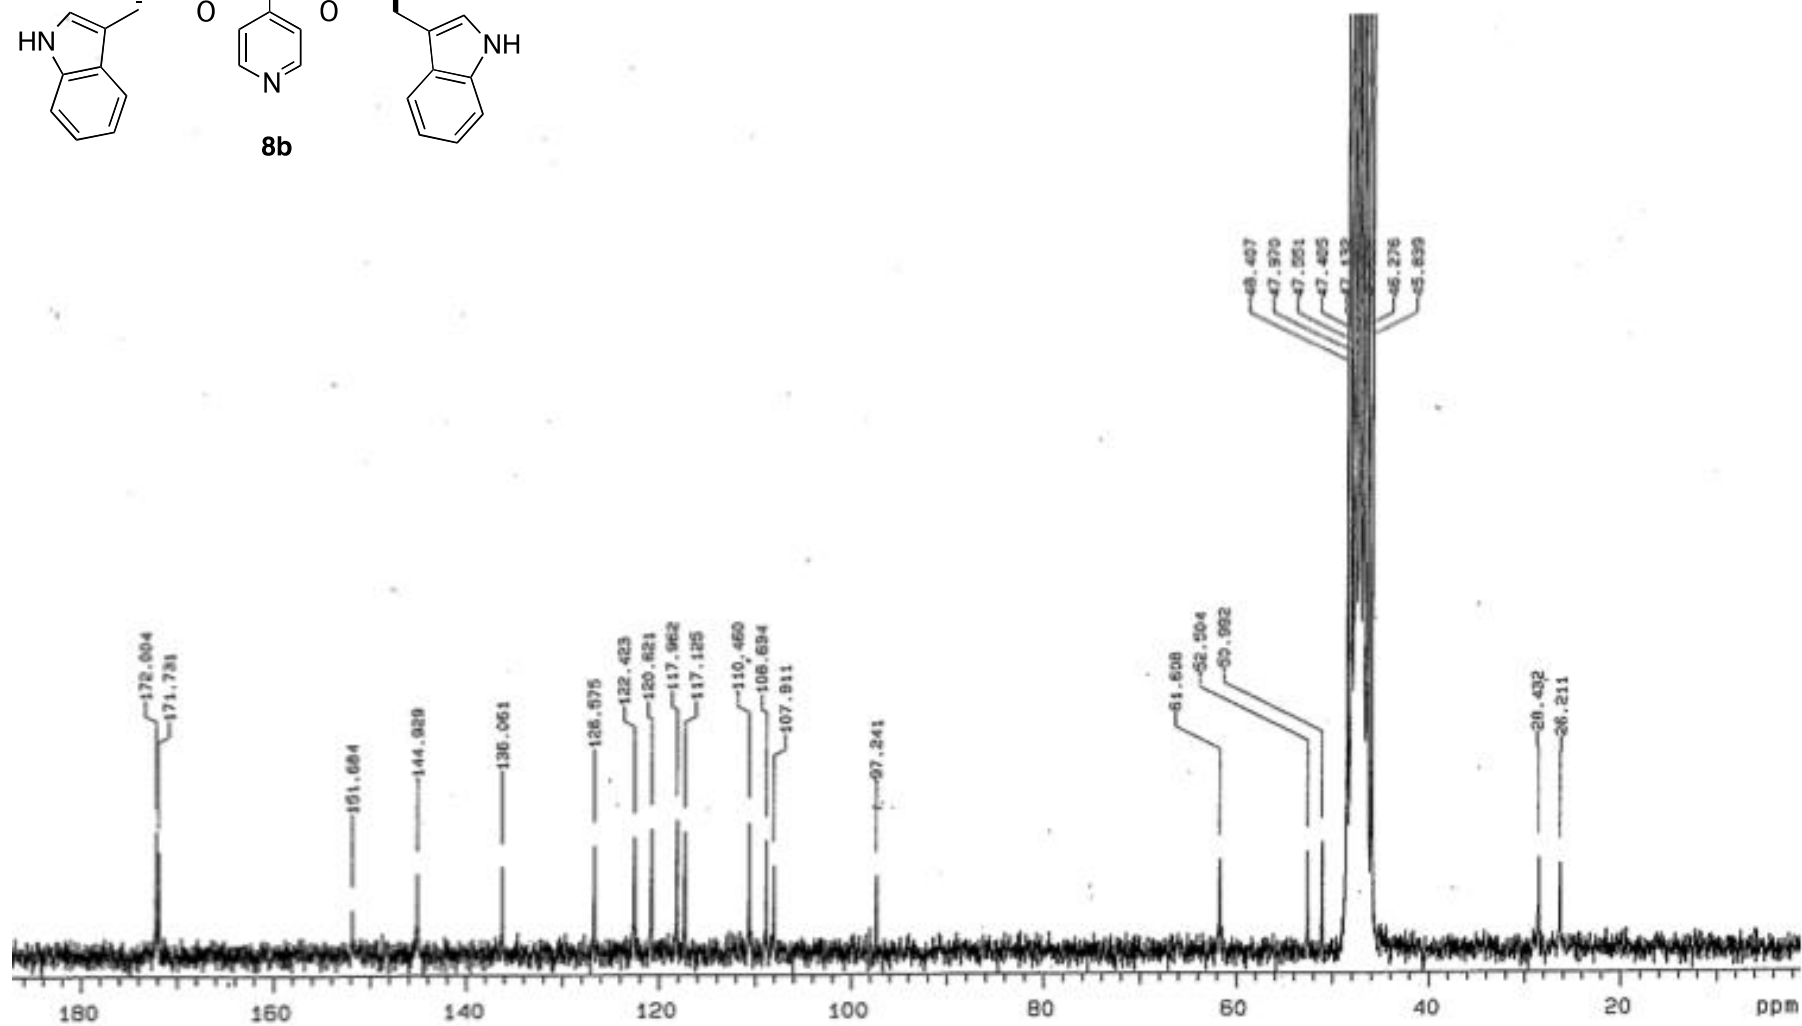

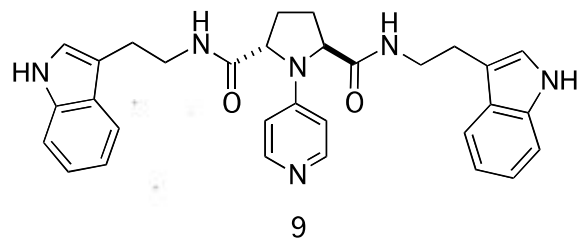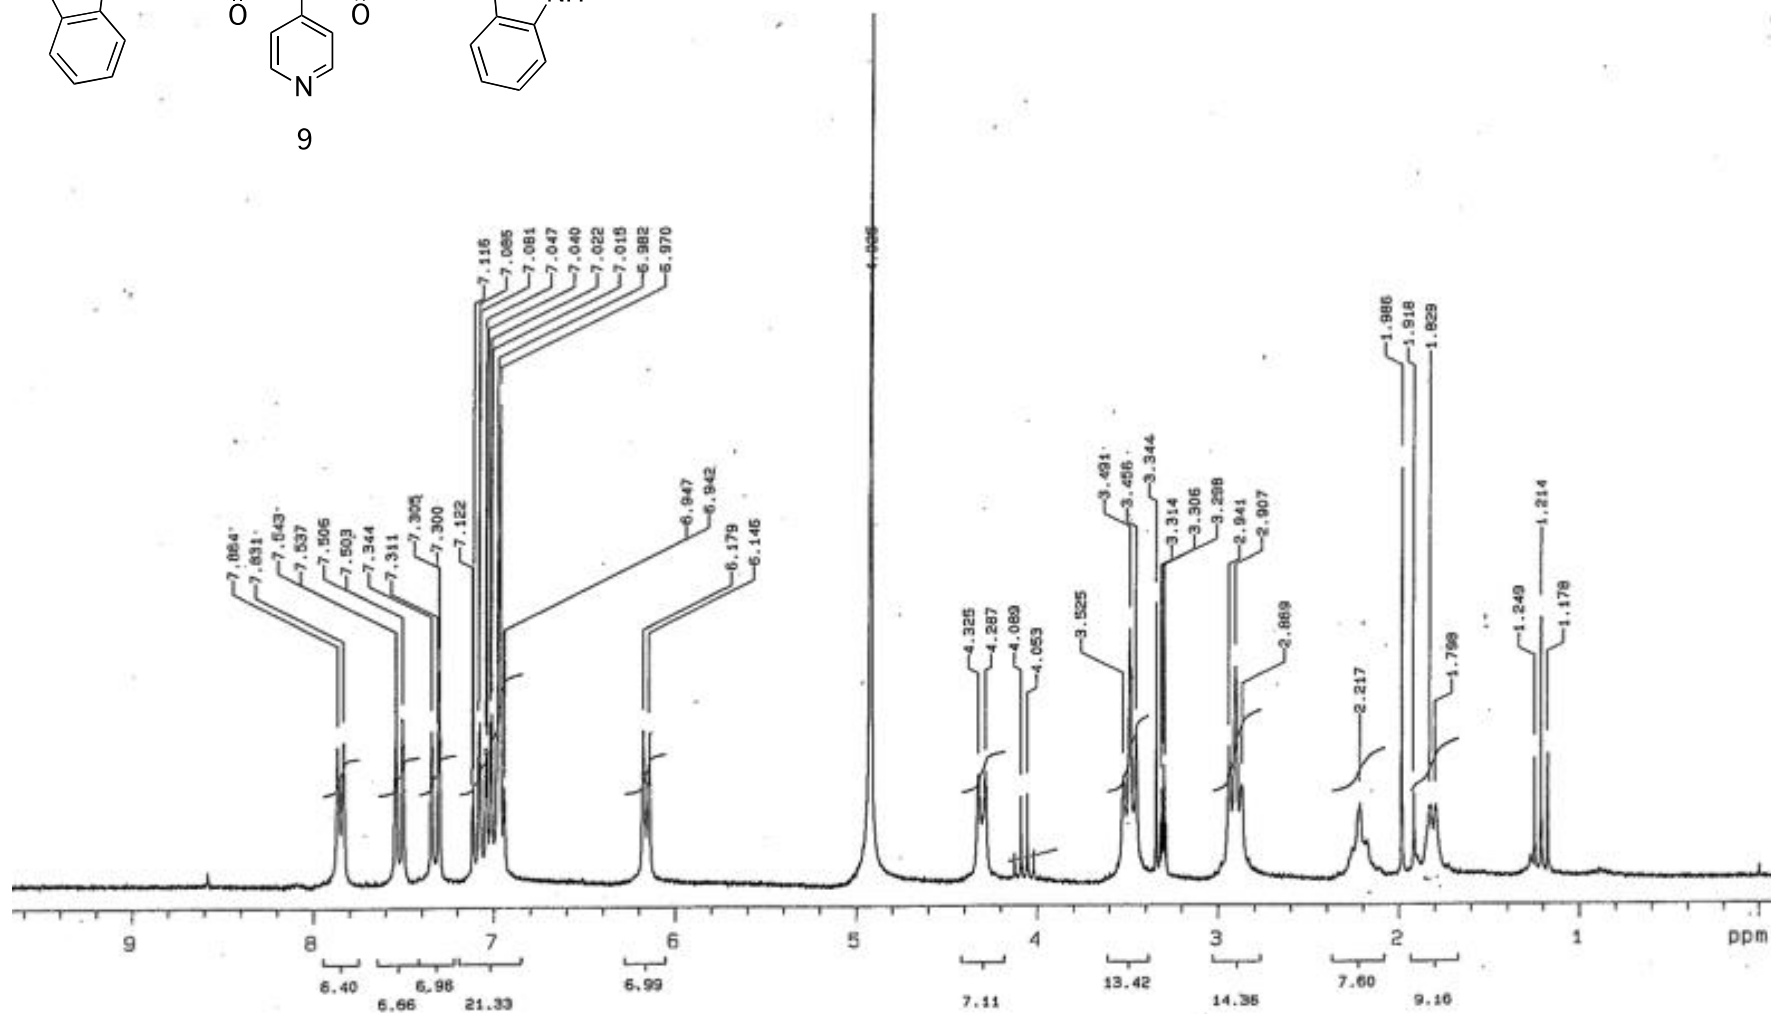



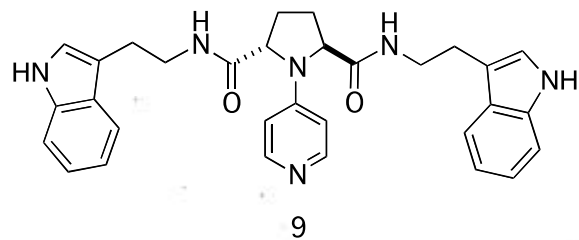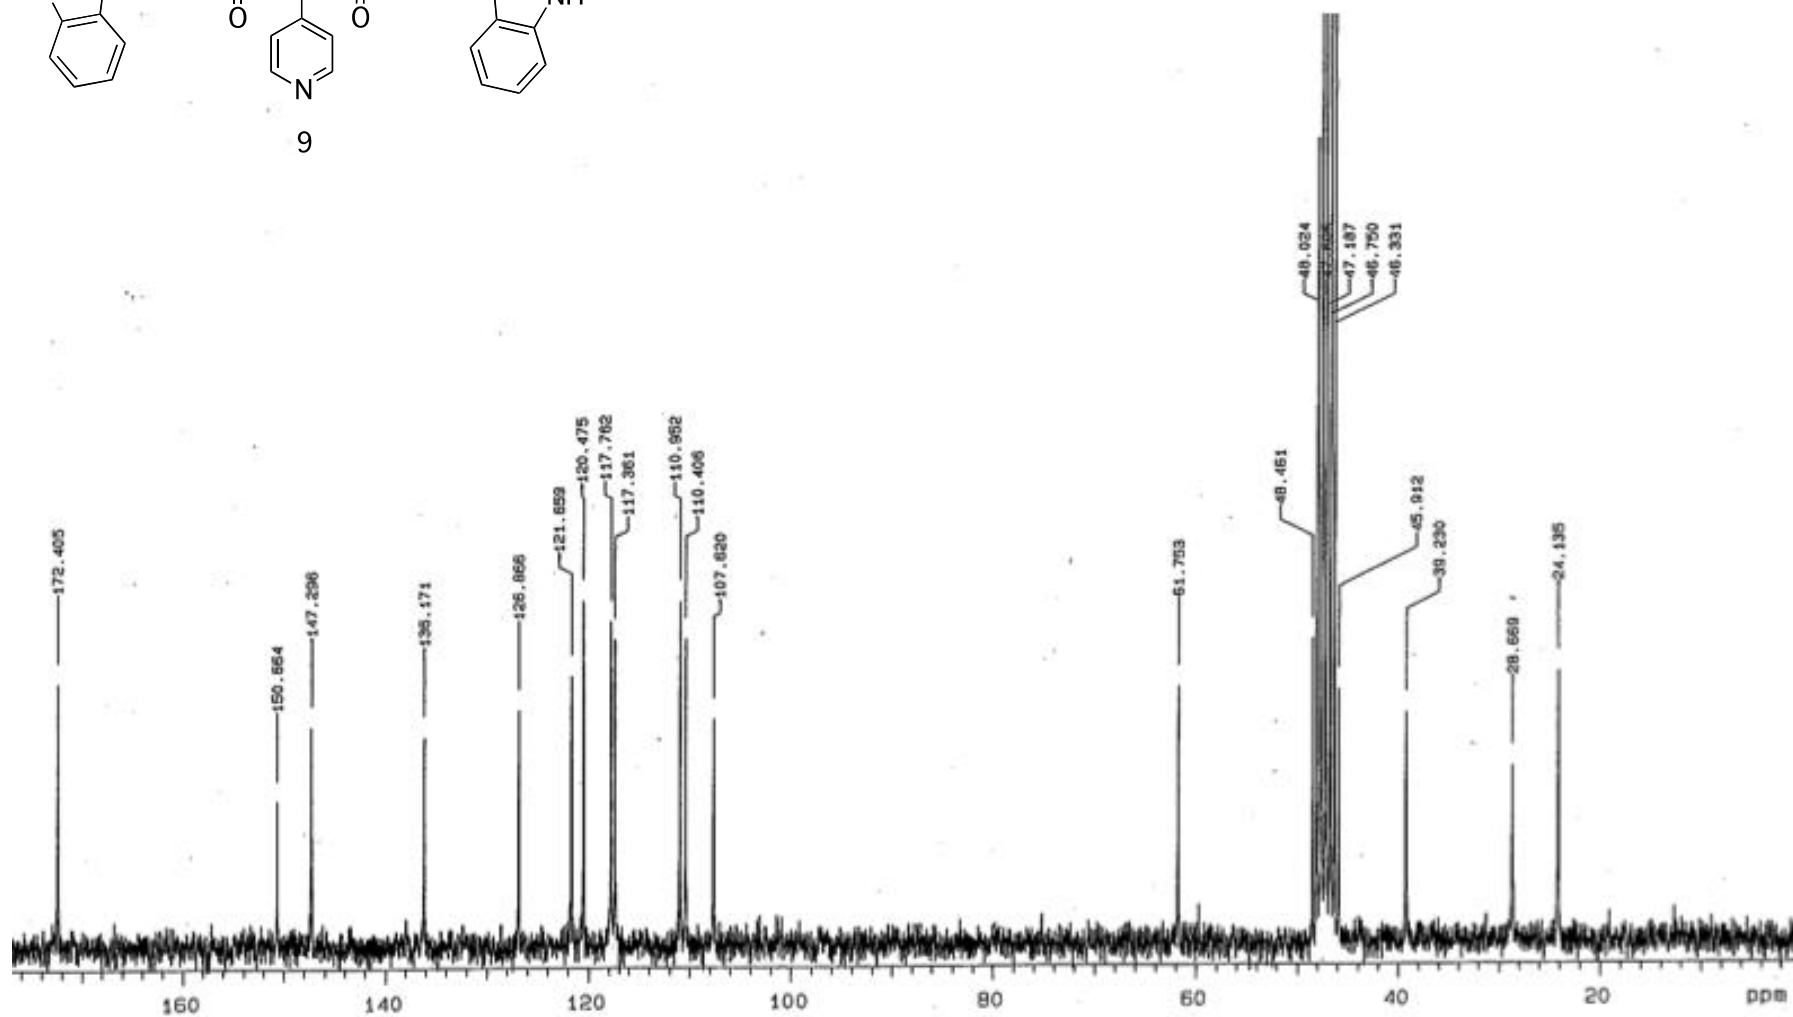

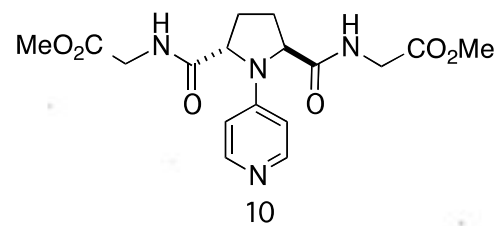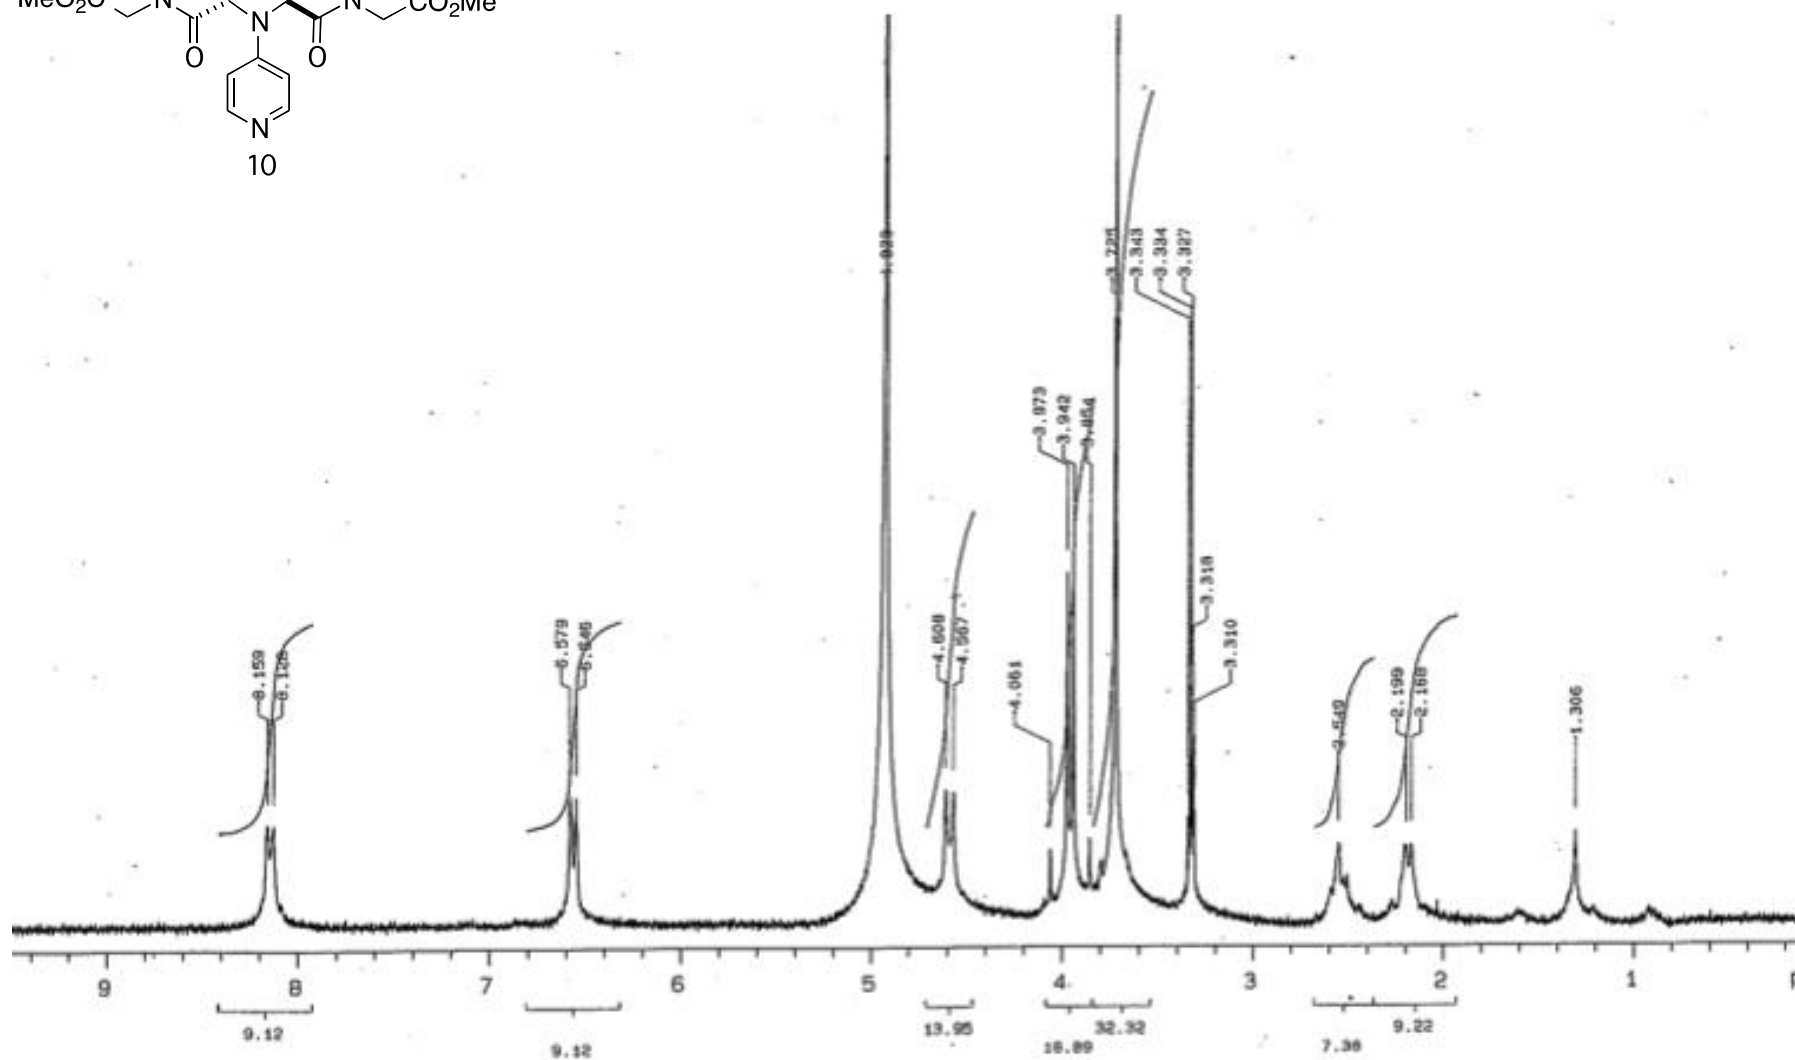

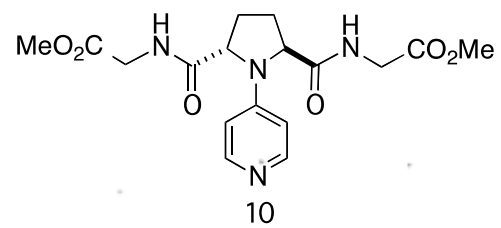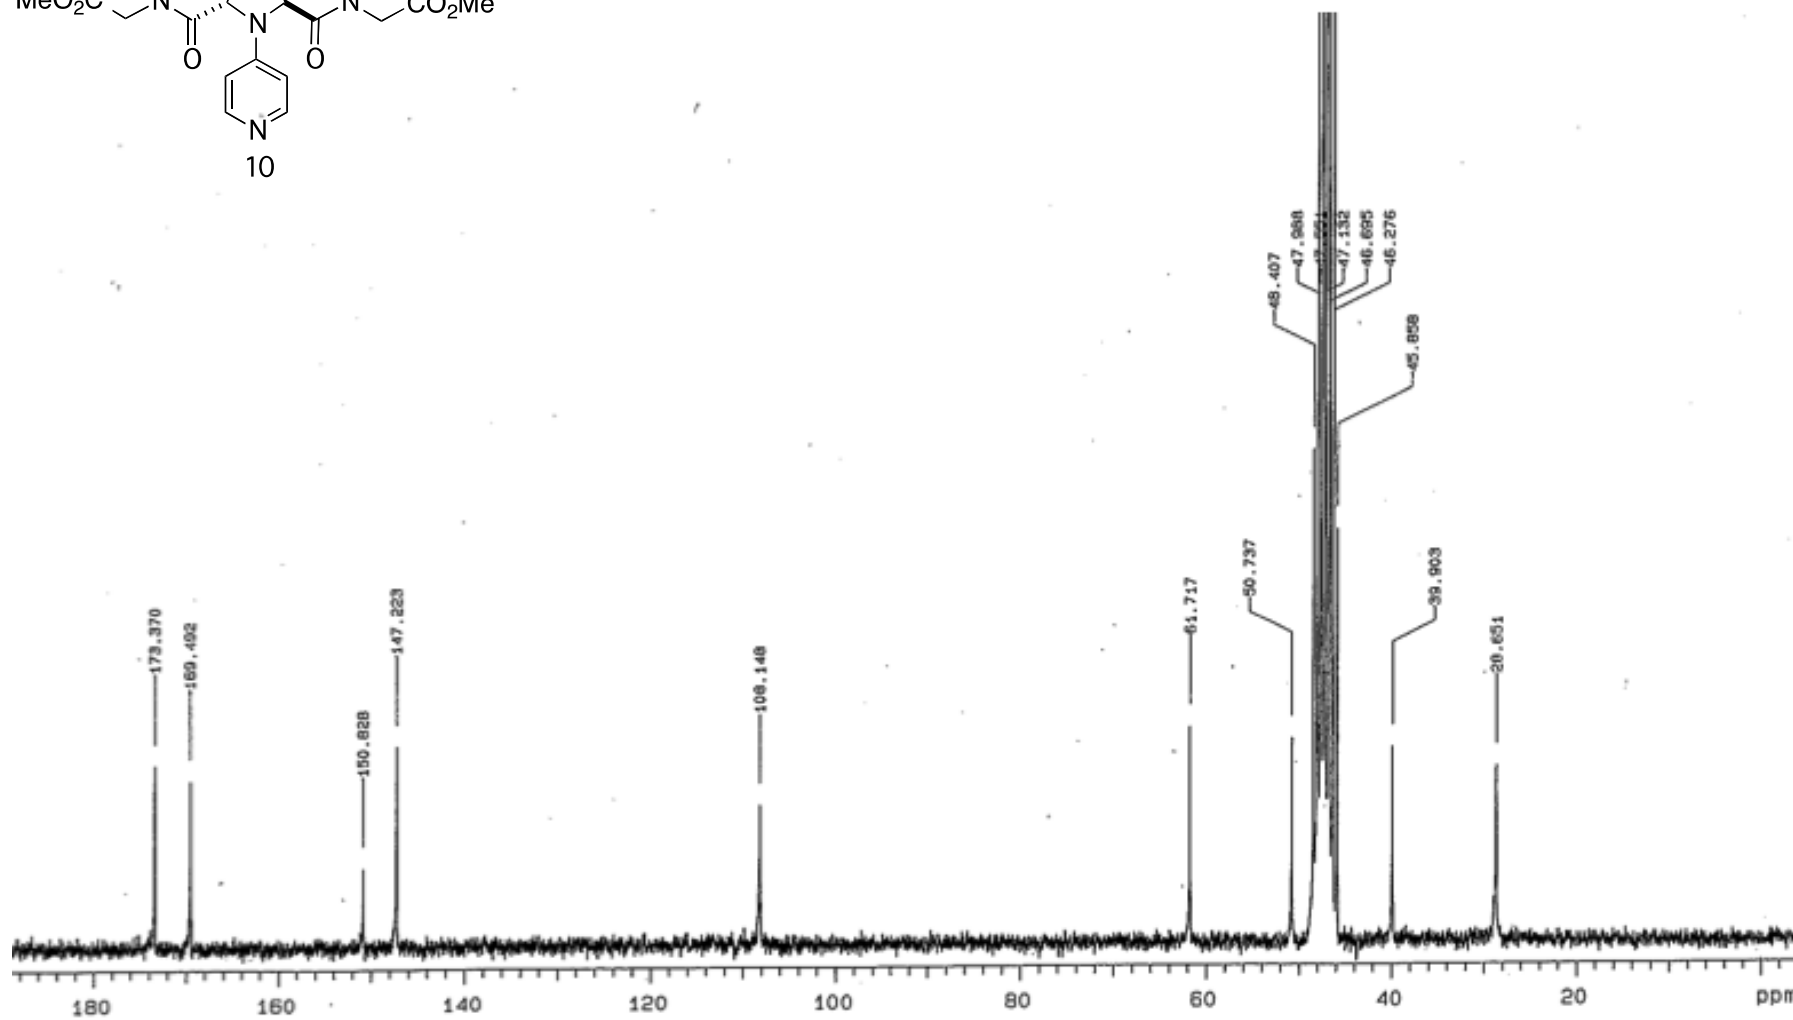

## STANDARD 1K OBSERVE

expl stdlh

| SAMPLE      |             | DEC. & VT  |          |
|-------------|-------------|------------|----------|
| date        | Dec 15 2003 | dfreq      | 199.976  |
| solvent     | CDCl3       | dn         | H1       |
| file        |             | exp        | dof      |
| ACQUISITION |             | dm         | nan      |
| sfreq       | 199.976     | dms        | c        |
| tn          | H1          | dmf        | 9000     |
| at          | 4.000       | PROCESSING |          |
| np          | 32000       | wtfile     |          |
| sw          | 4000.0      | prog       | ft       |
| fb          | 7500        | fn         | not used |
| bs          | 16          |            |          |
| pw          | 13.5        | weir       |          |
| dl          | 1.000       | wexp       |          |
| tof         | 0           | whs        |          |
| nt          | 16          | wnt        |          |
| ct          | 16          |            |          |
| alock       | n           |            |          |
| gain        | not used    |            |          |
| F2AOS       |             |            |          |
| il          | n           |            |          |
| in          | n           |            |          |
| dp          | y           |            |          |
| DISPLAY     |             |            |          |
| sp          | -20.3       |            |          |
| wp          | 1999.6      |            |          |
| vs          | 4994        |            |          |
| sc          | 0           |            |          |
| wc          | 370         |            |          |
| hnmw        | 5.40        |            |          |
| is          | 11663.60    |            |          |
| rfl         | 997.4       |            |          |
| rfp         | 0           |            |          |
| th          | 15          |            |          |
| ins         | 100.000     |            |          |
| ai          | cdc ph      |            |          |

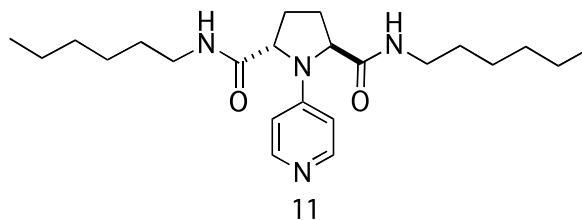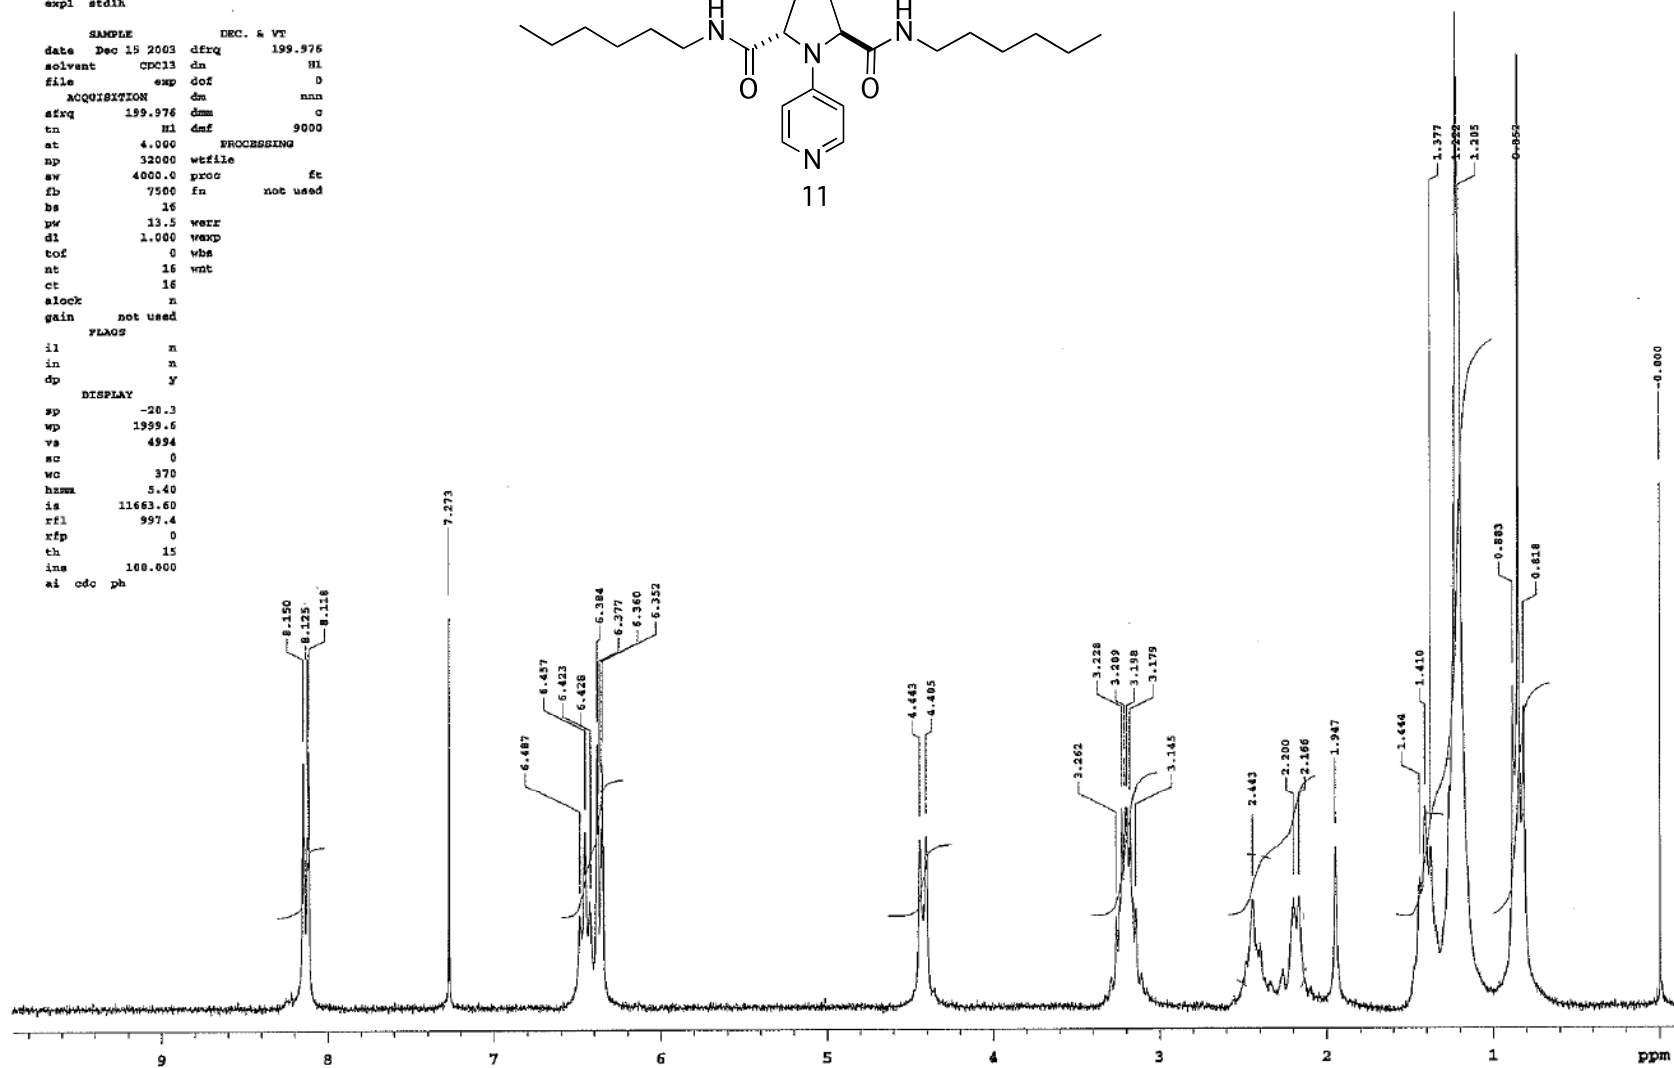

13C OBSERVE

exptl std13c

| SAMPLE      |             | DEC. & VT  |          |
|-------------|-------------|------------|----------|
| date        | Dec 15 2003 | dfrq       | 199.976  |
| solvent     | CDCl3       | dn         | H1       |
| file        | exp         | dof        | 0        |
| ACQUISITION |             | dm         |          |
| sfrq        | 50.289      | dma        | v        |
| tn          | C13         | dmf        | 9000     |
| at          | 0.999       | PROCESSING |          |
| np          | 29984       | lb         | 1.00     |
| sv          | 15000.0     | utfile     |          |
| fb          | 7500        | proc       | ft       |
| bs          | 32          | fn         | not used |
| pw          | 6.7         |            |          |
| di          | 2.000       | werr       |          |
| tof         | 0           | wcomp      |          |
| nt          | 10000       | uba        |          |
| ct          | 1248        | wmt        |          |
| alock       | n           |            |          |
| gain        | not used    |            |          |
| FLAGS       |             |            |          |
| il          | n           |            |          |
| in          | n           |            |          |
| dp          | y           |            |          |
| DISPLAY     |             |            |          |
| sp          | 27.0        |            |          |
| vp          | 10011.9     |            |          |
| vs          | 6101        |            |          |
| sc          | 0           |            |          |
| vc          | 370         |            |          |
| hzm         | 27.06       |            |          |
| is          | 500.00      |            |          |
| rfl         | 2609.9      |            |          |
| rfp         | 0           |            |          |
| th          | 17          |            |          |
| ins         | 100.000     |            |          |
| ai          | cdc         | ph         |          |

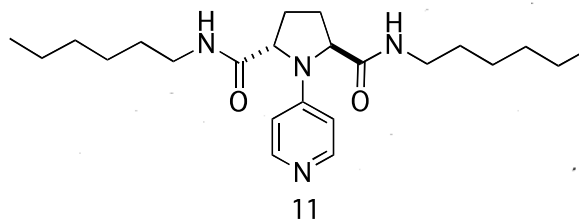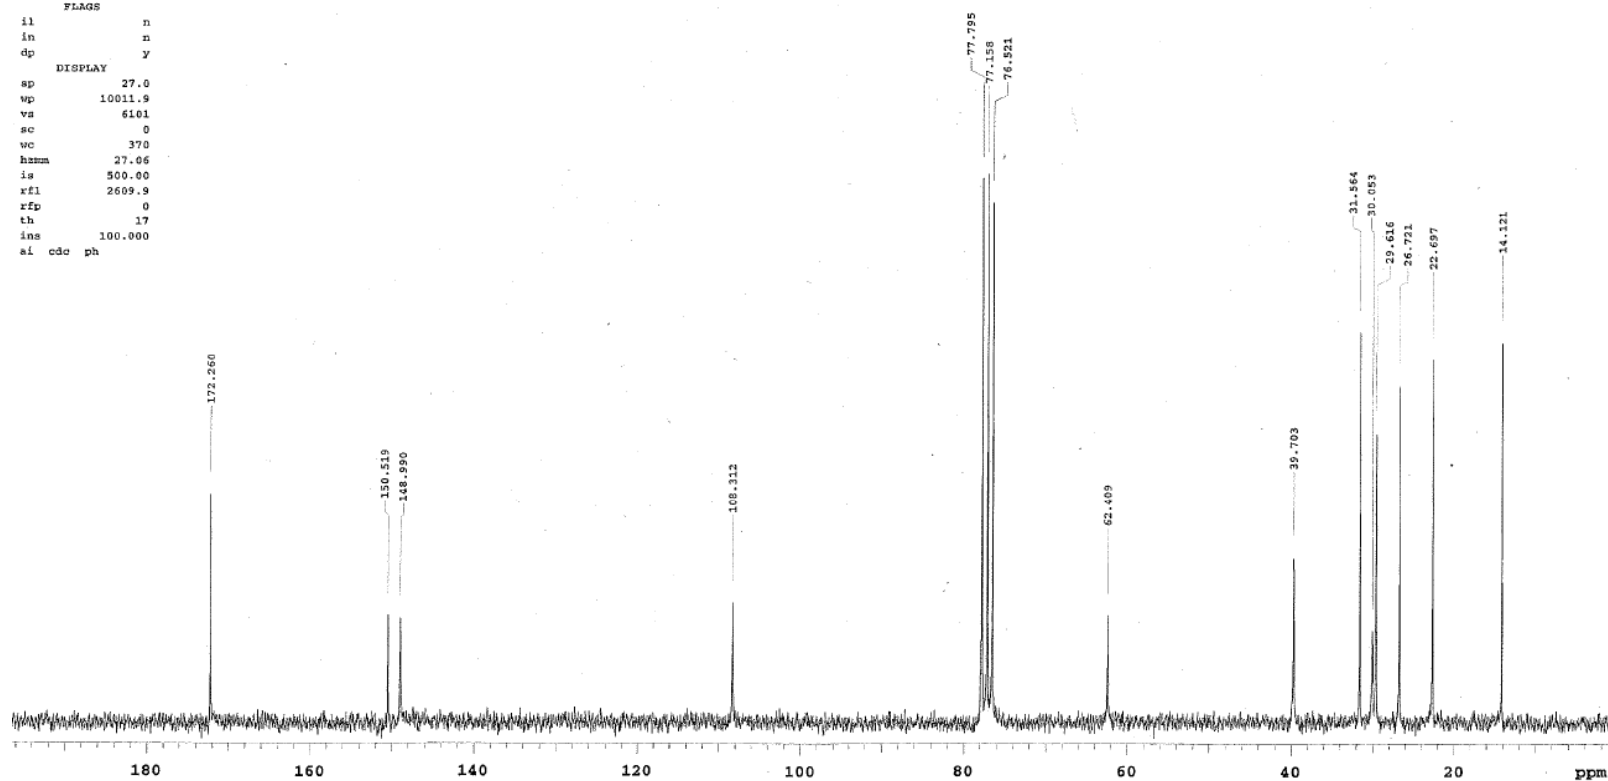

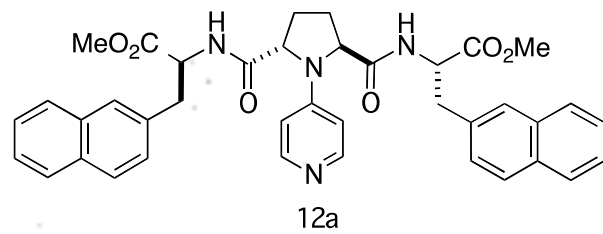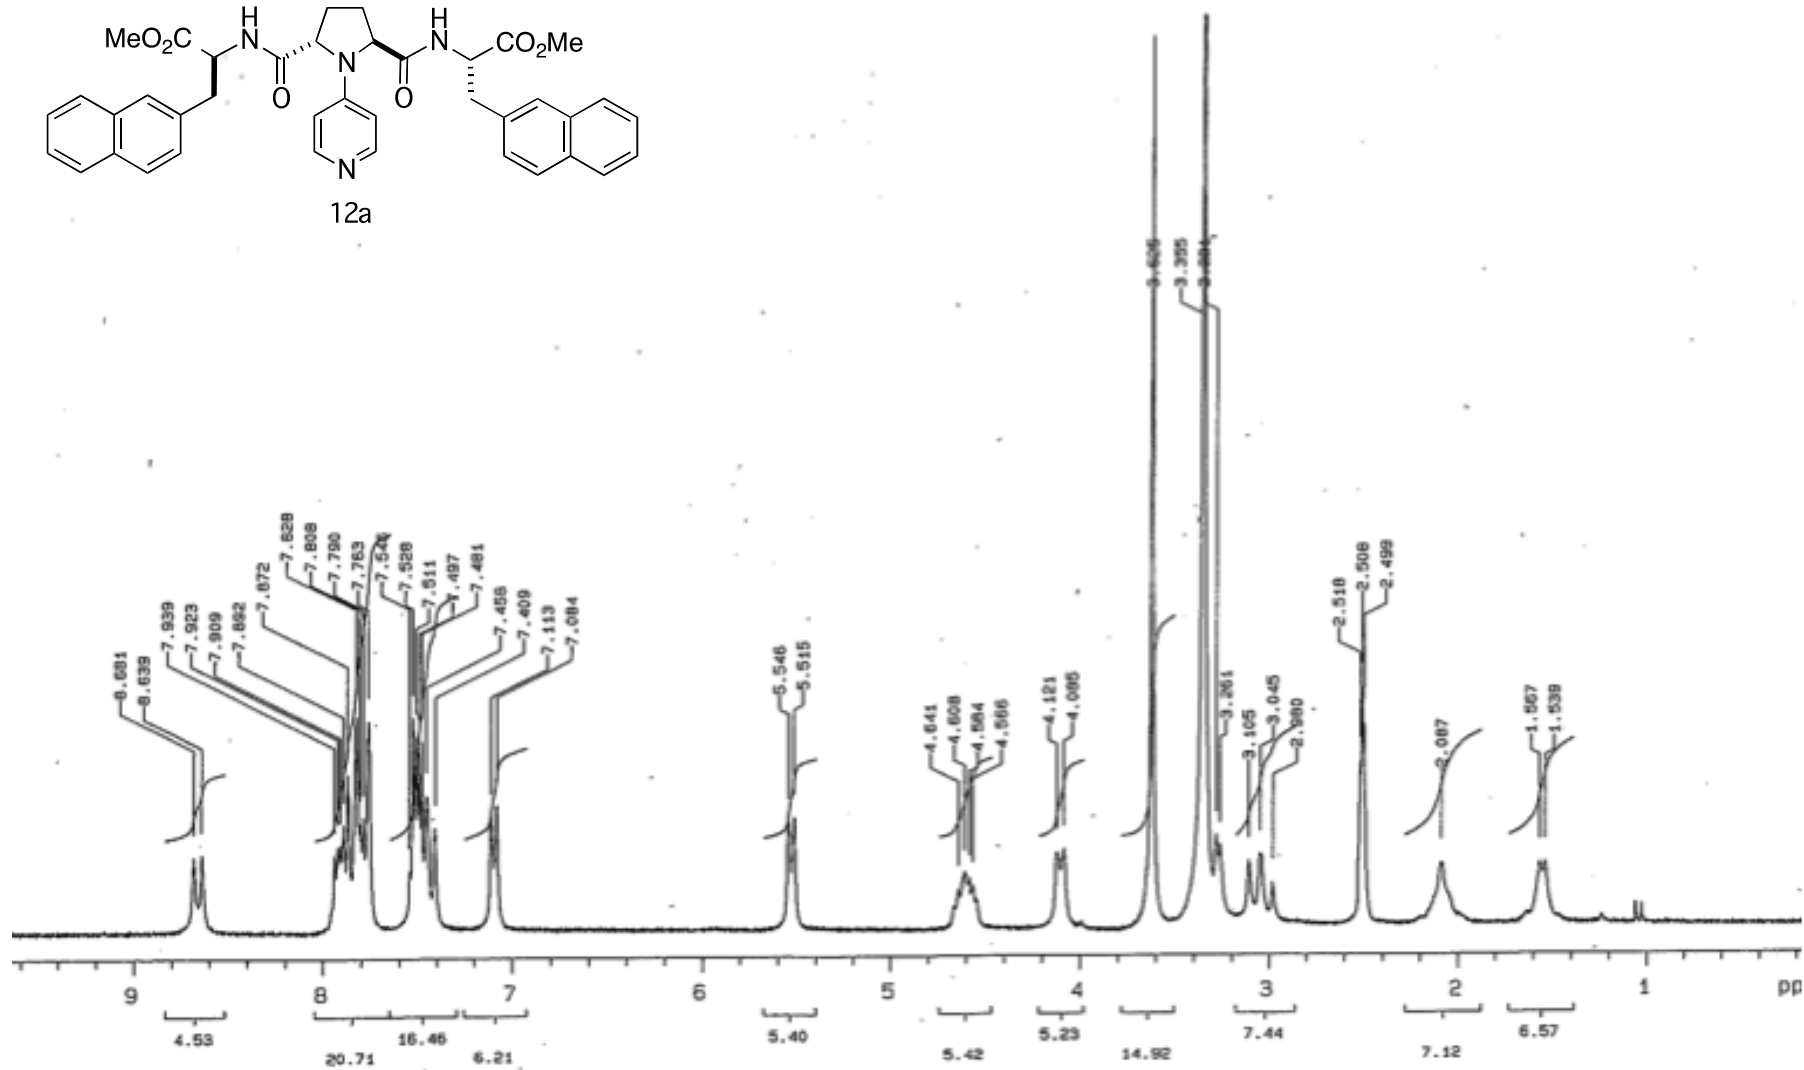

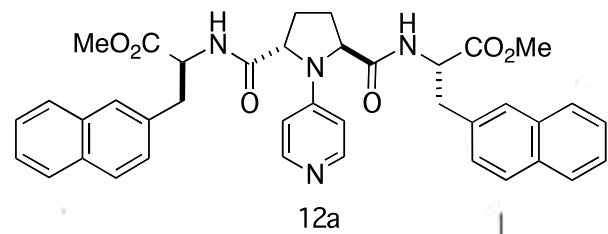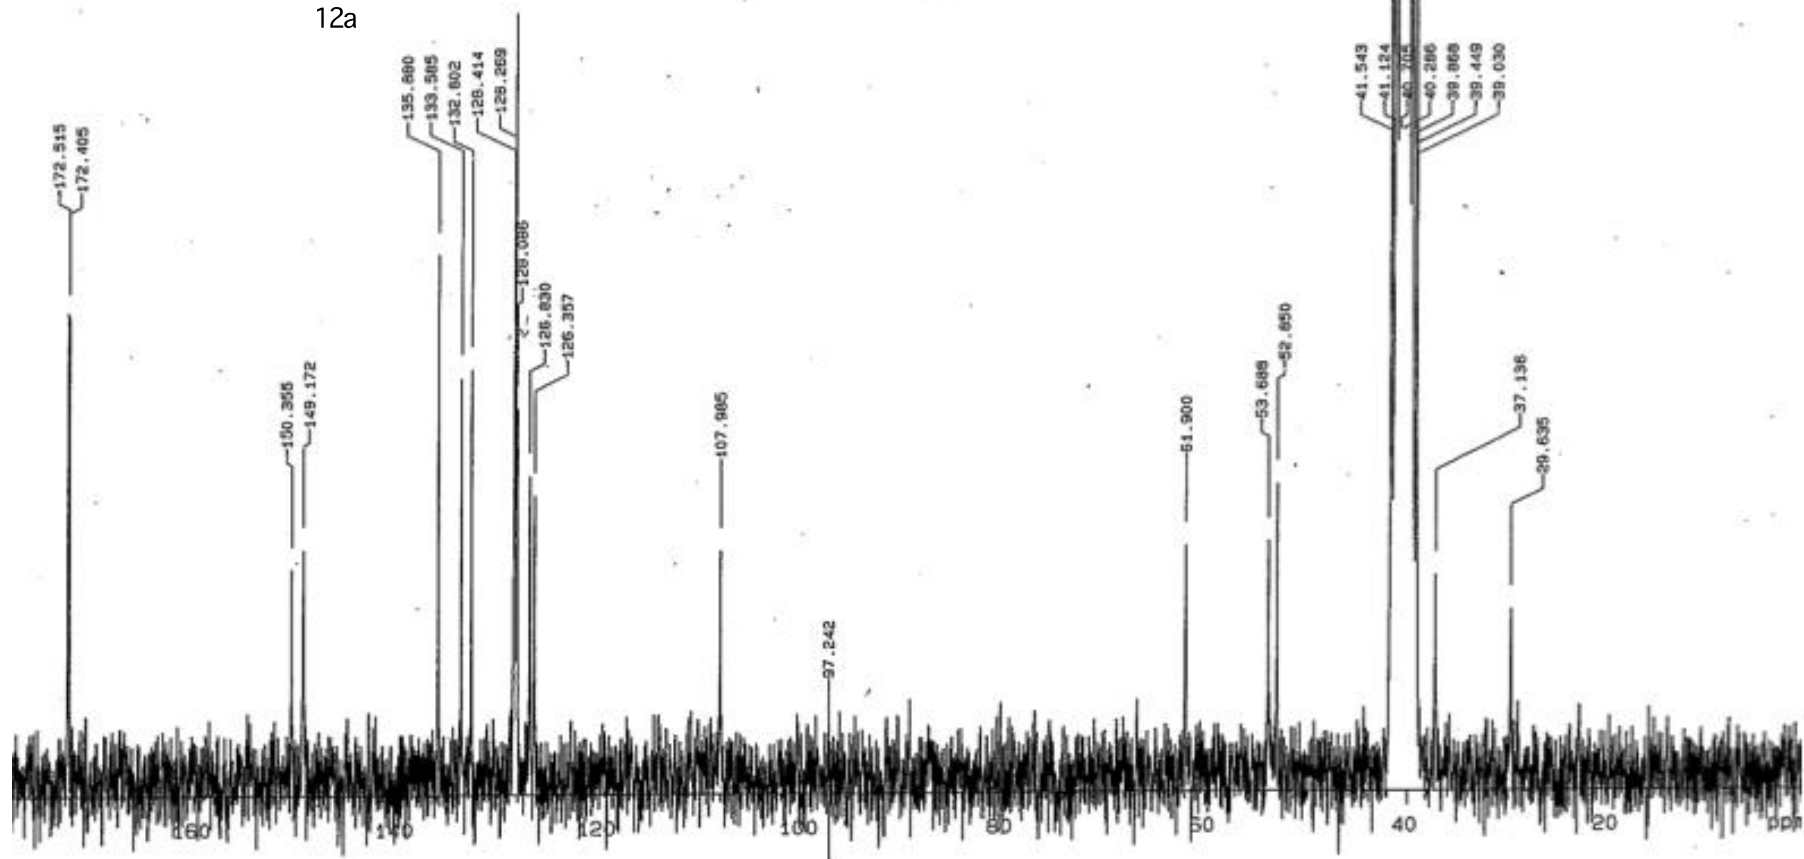

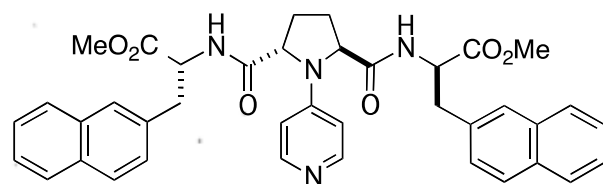

12b

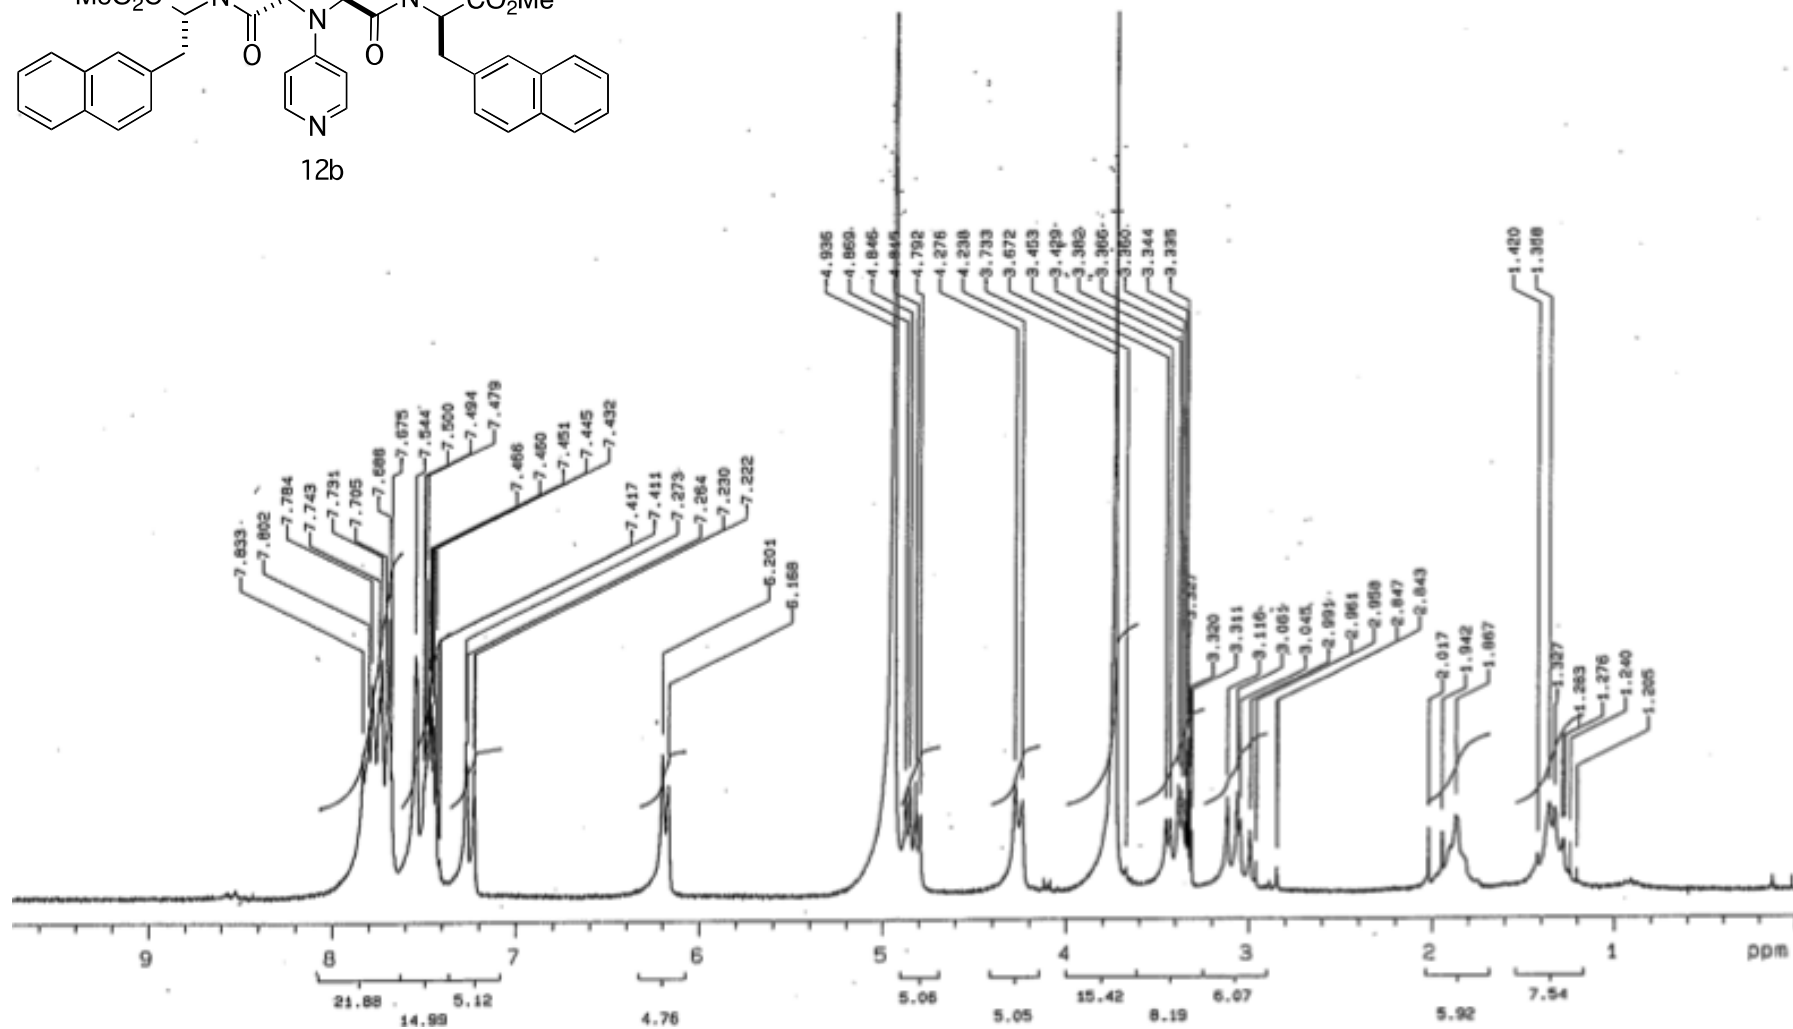



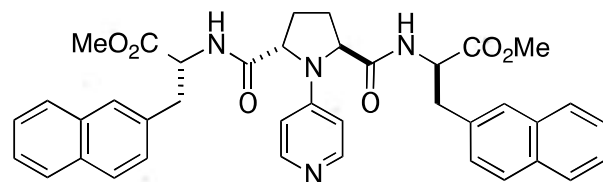

12b

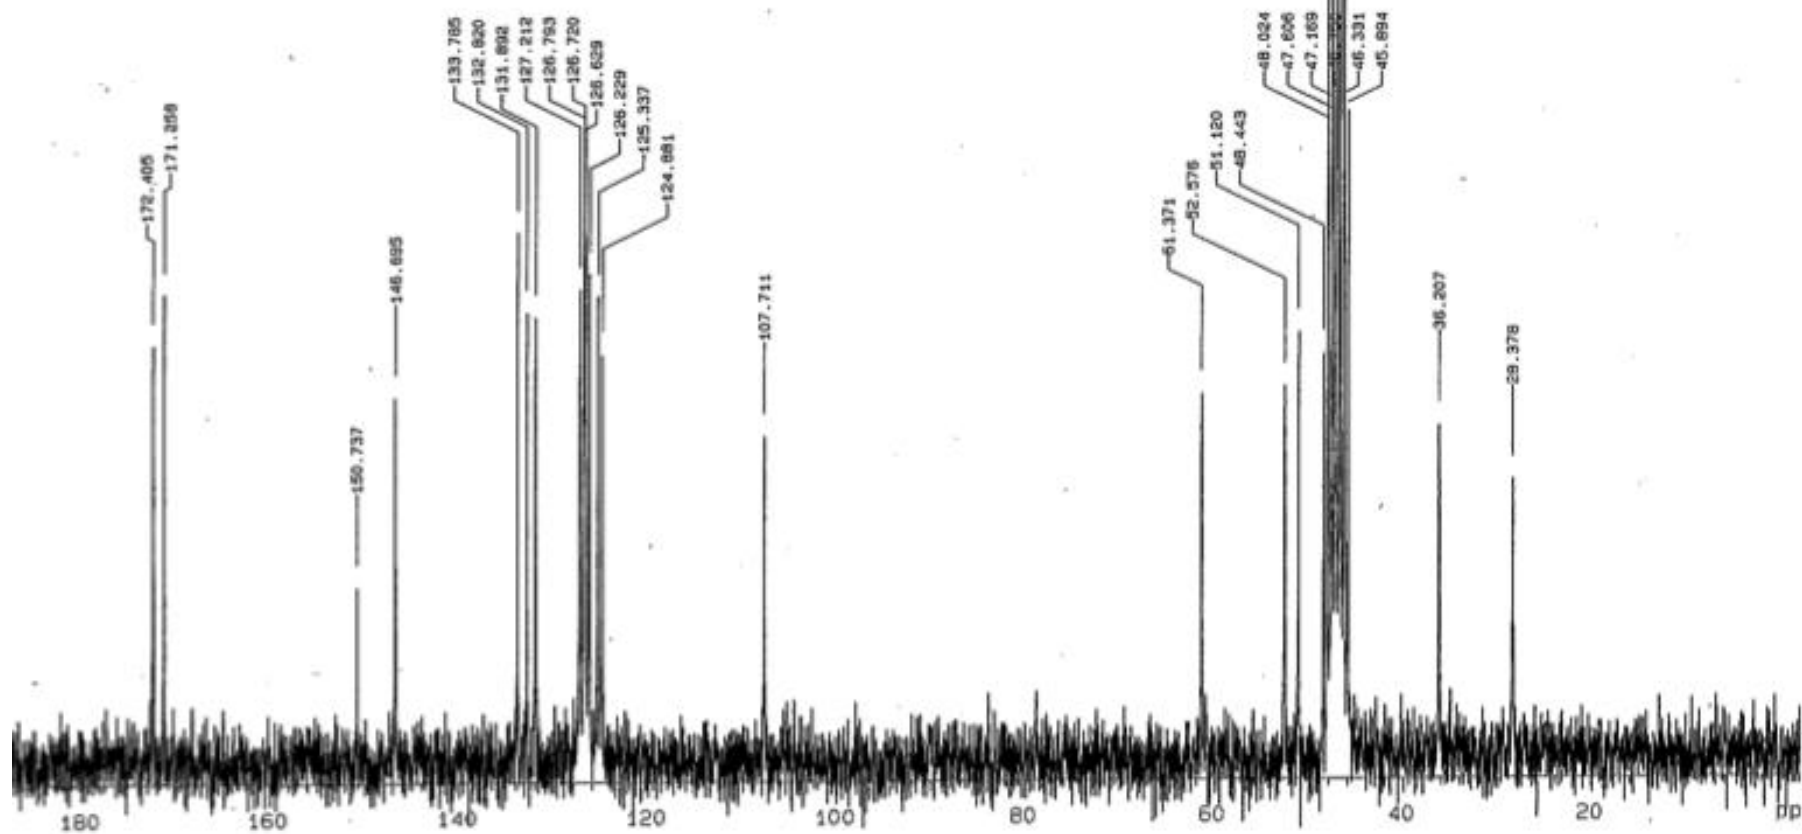

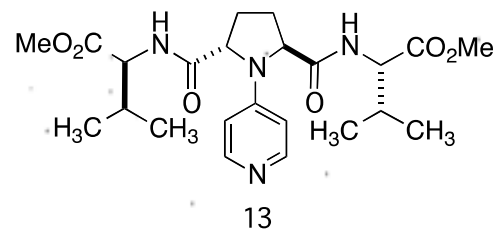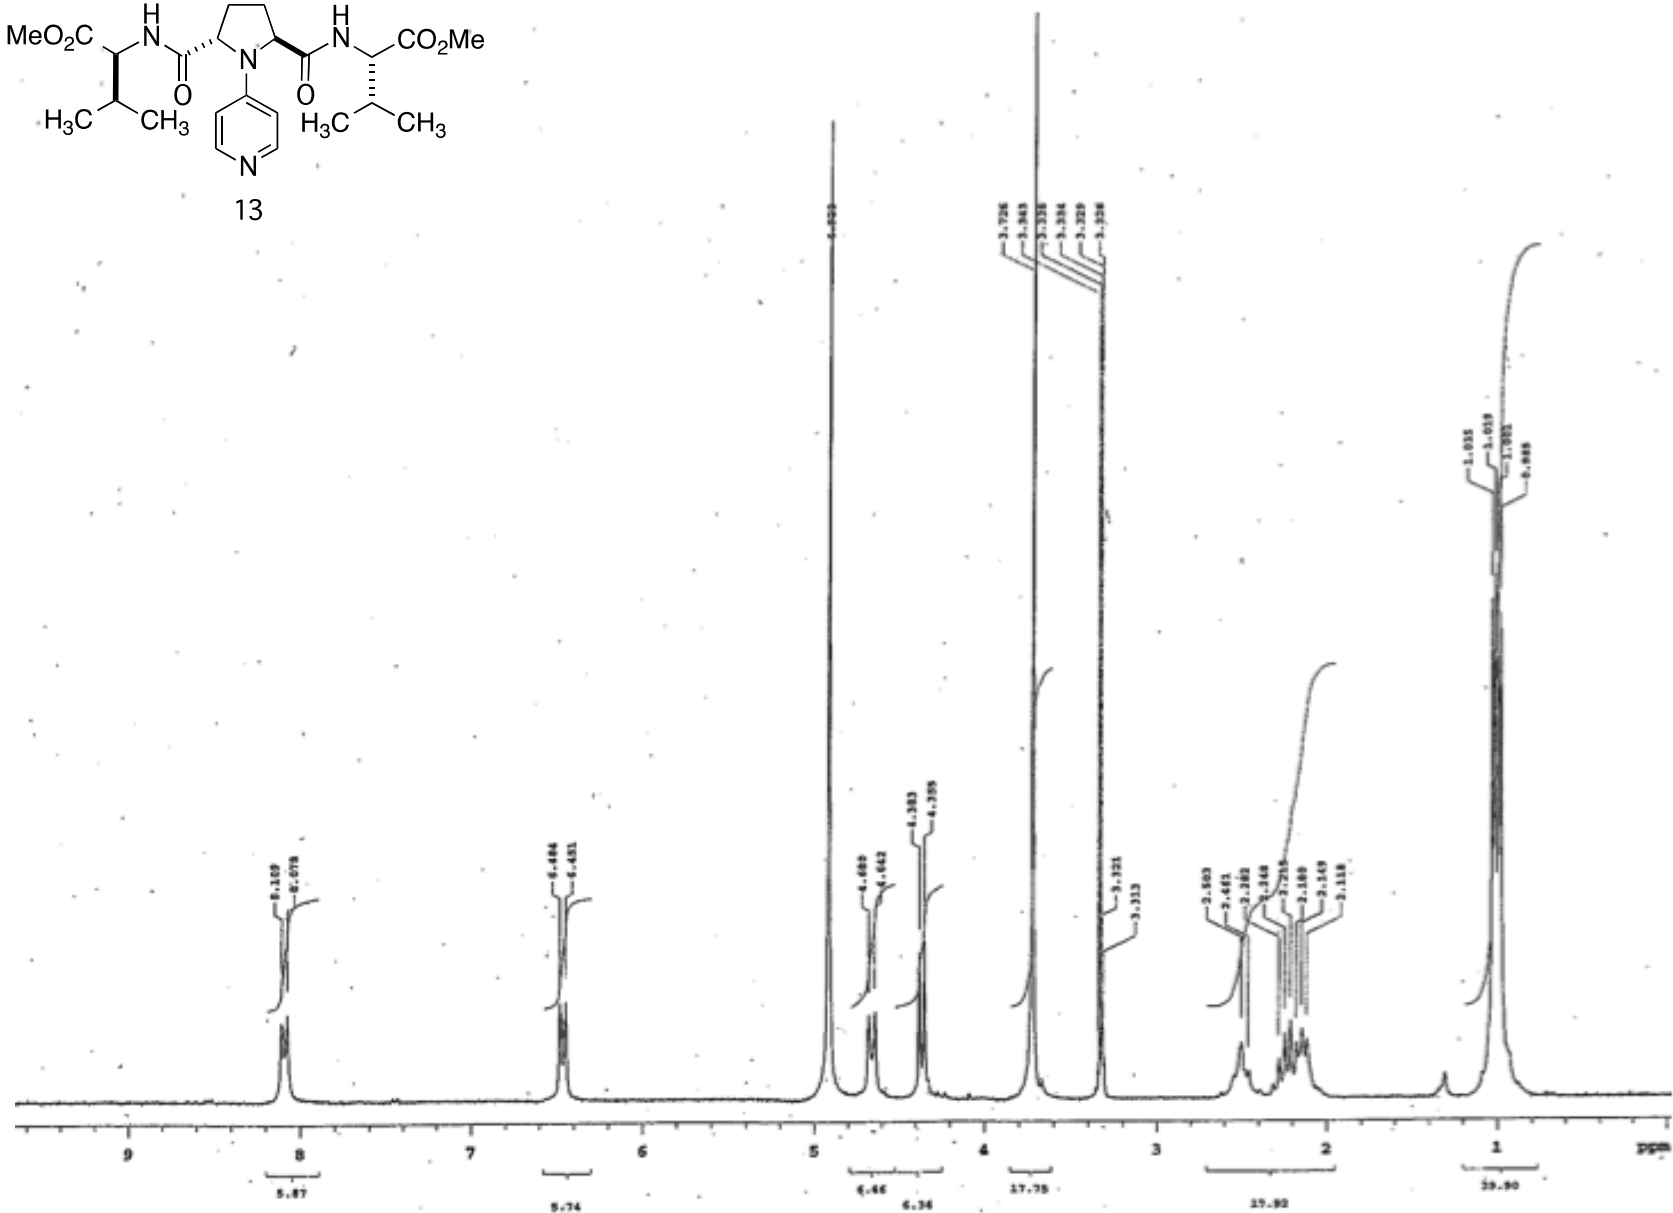

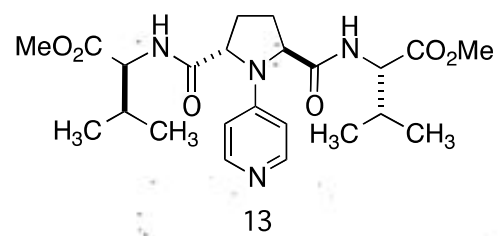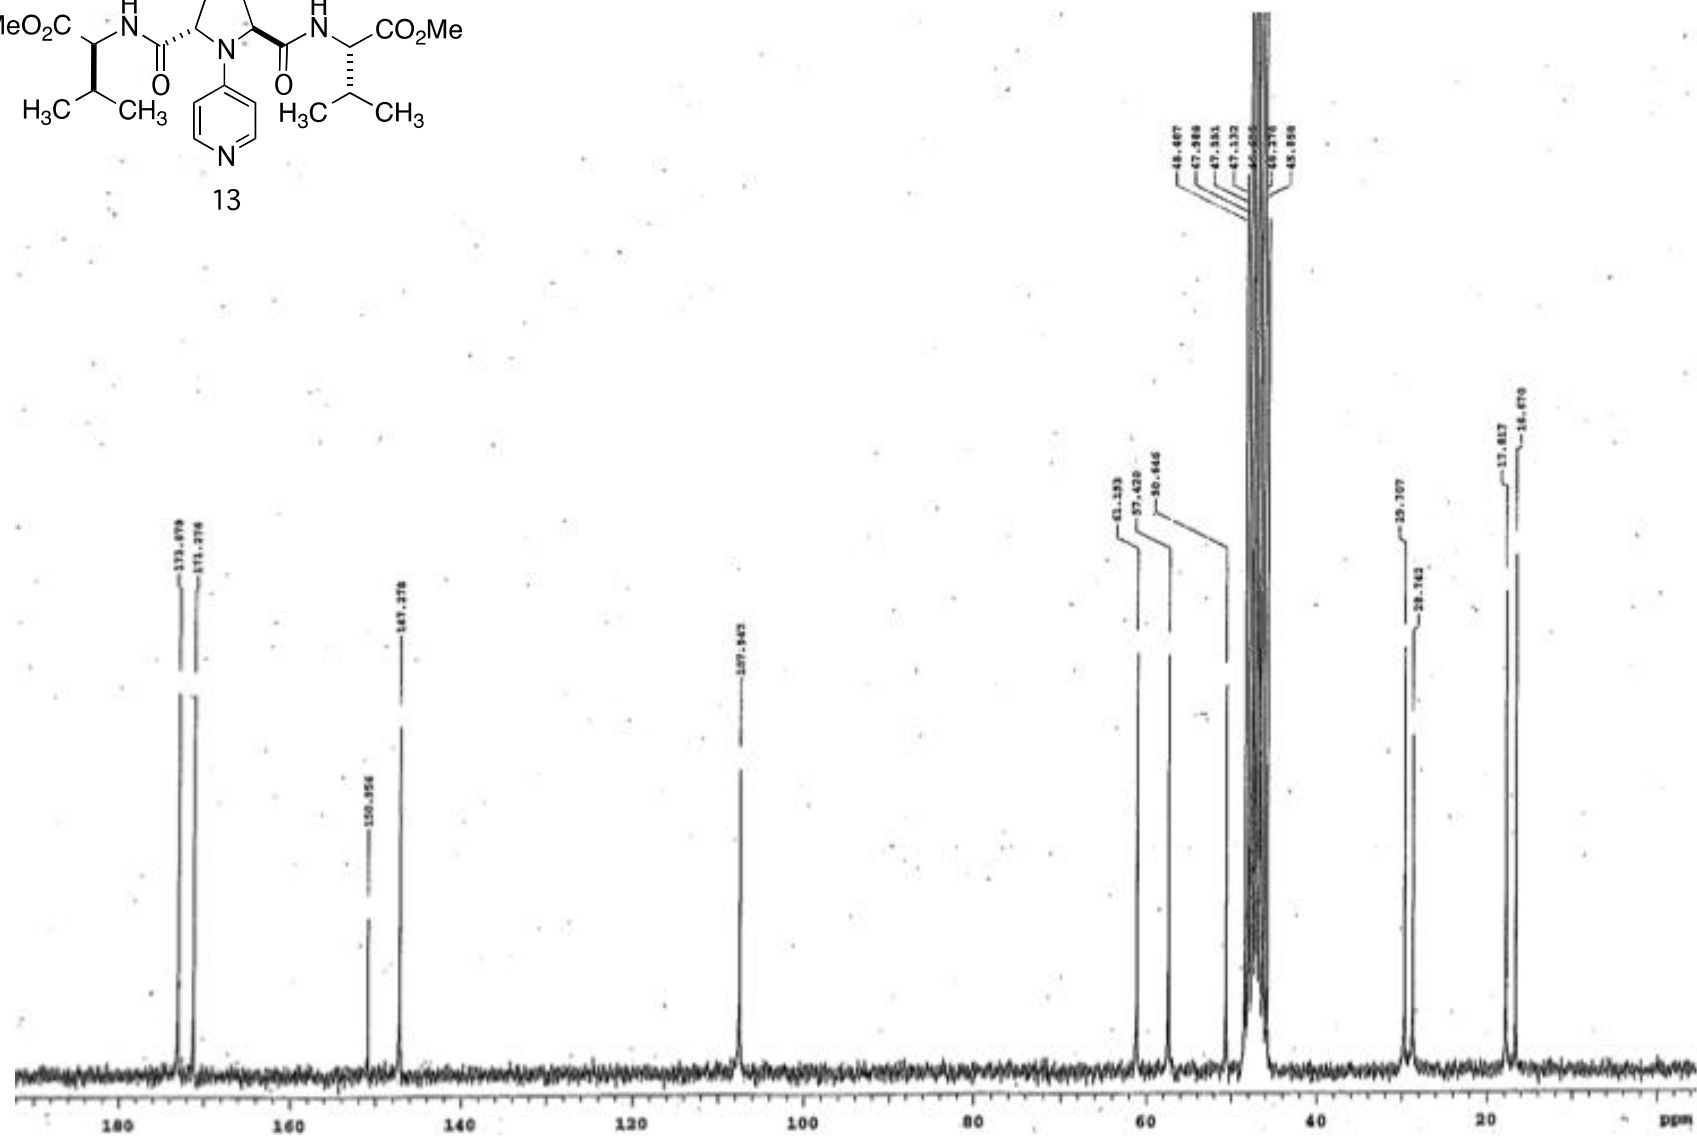

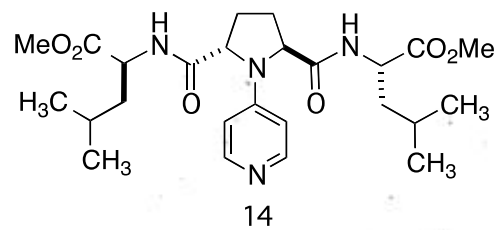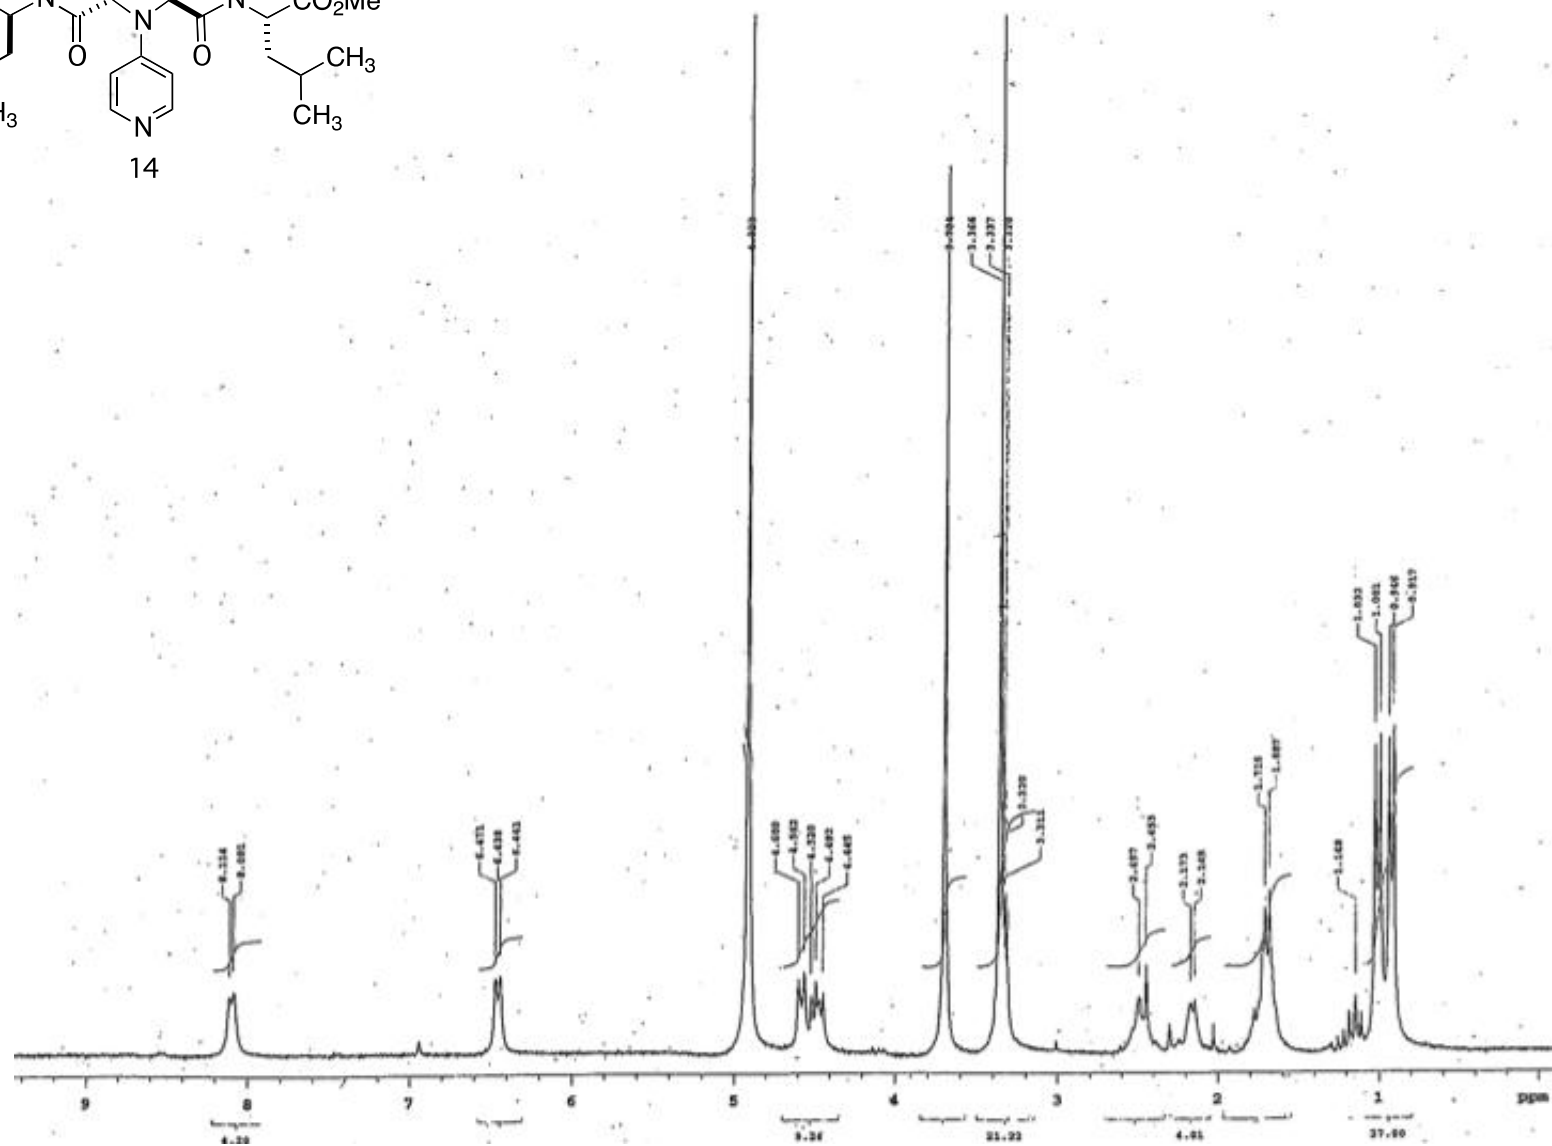

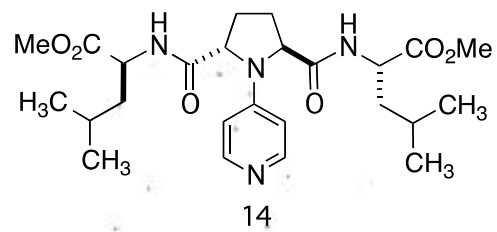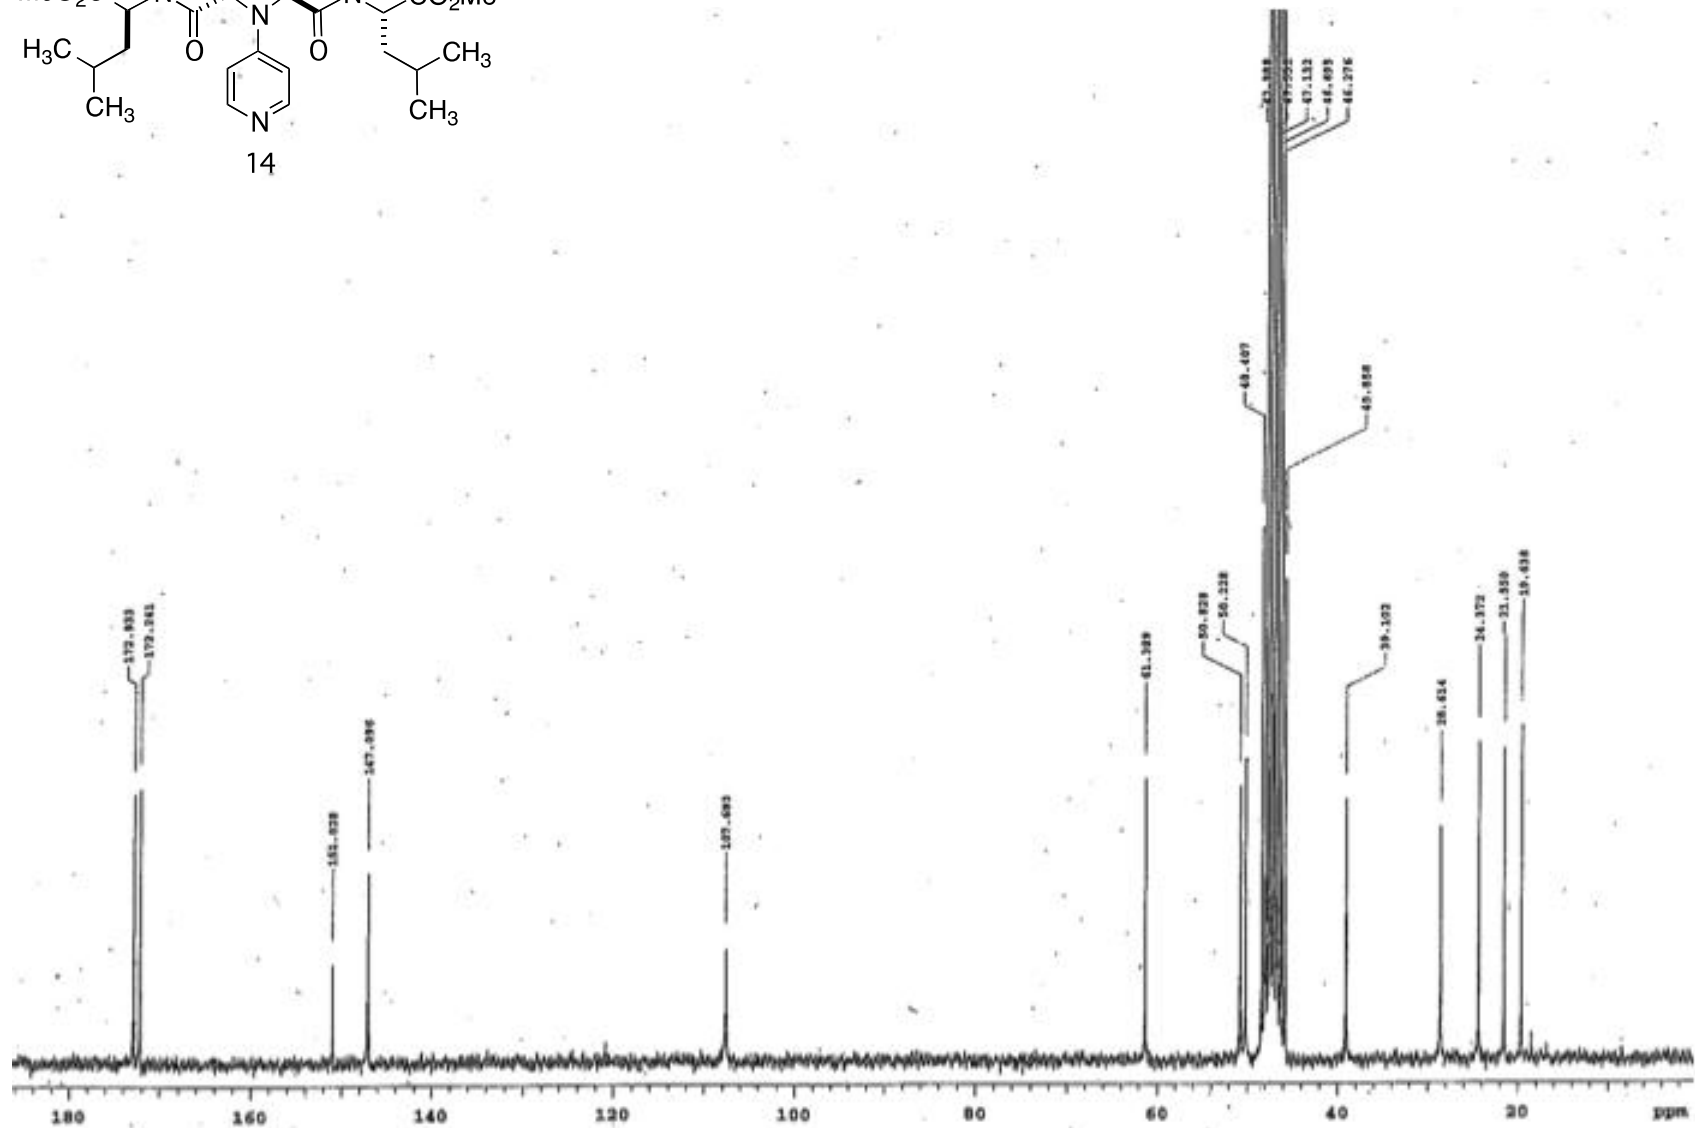

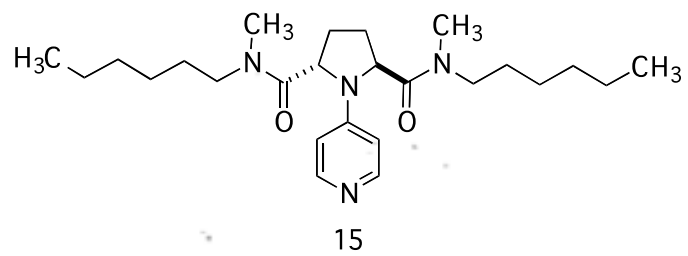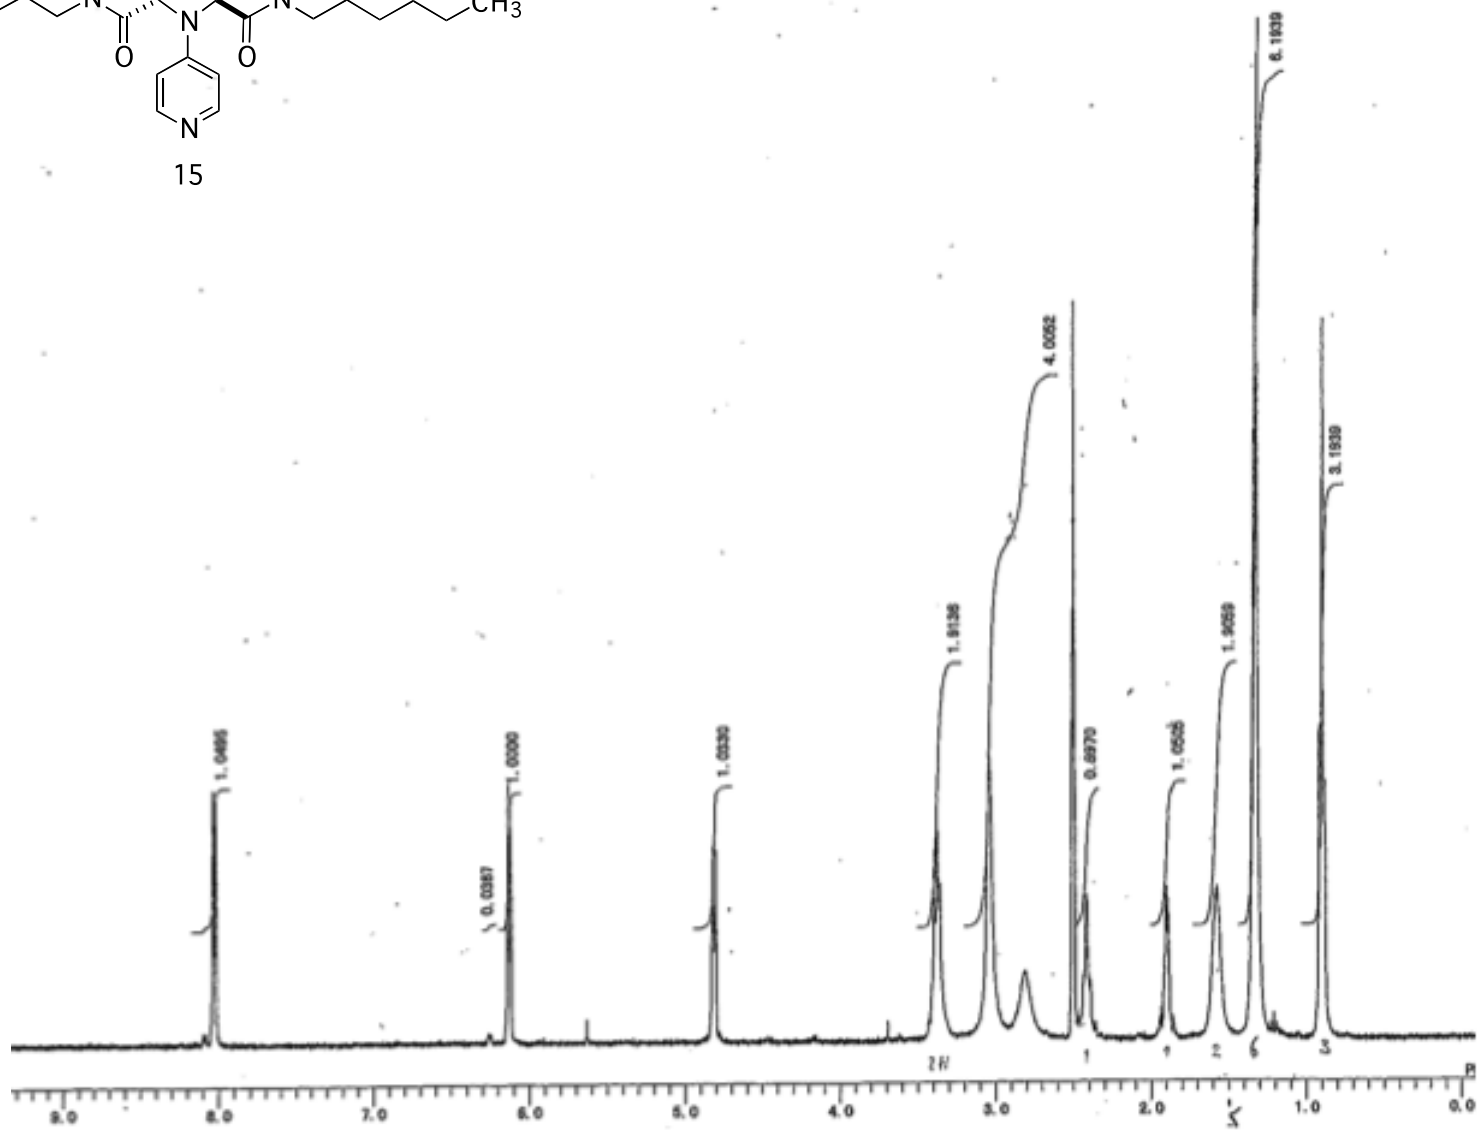

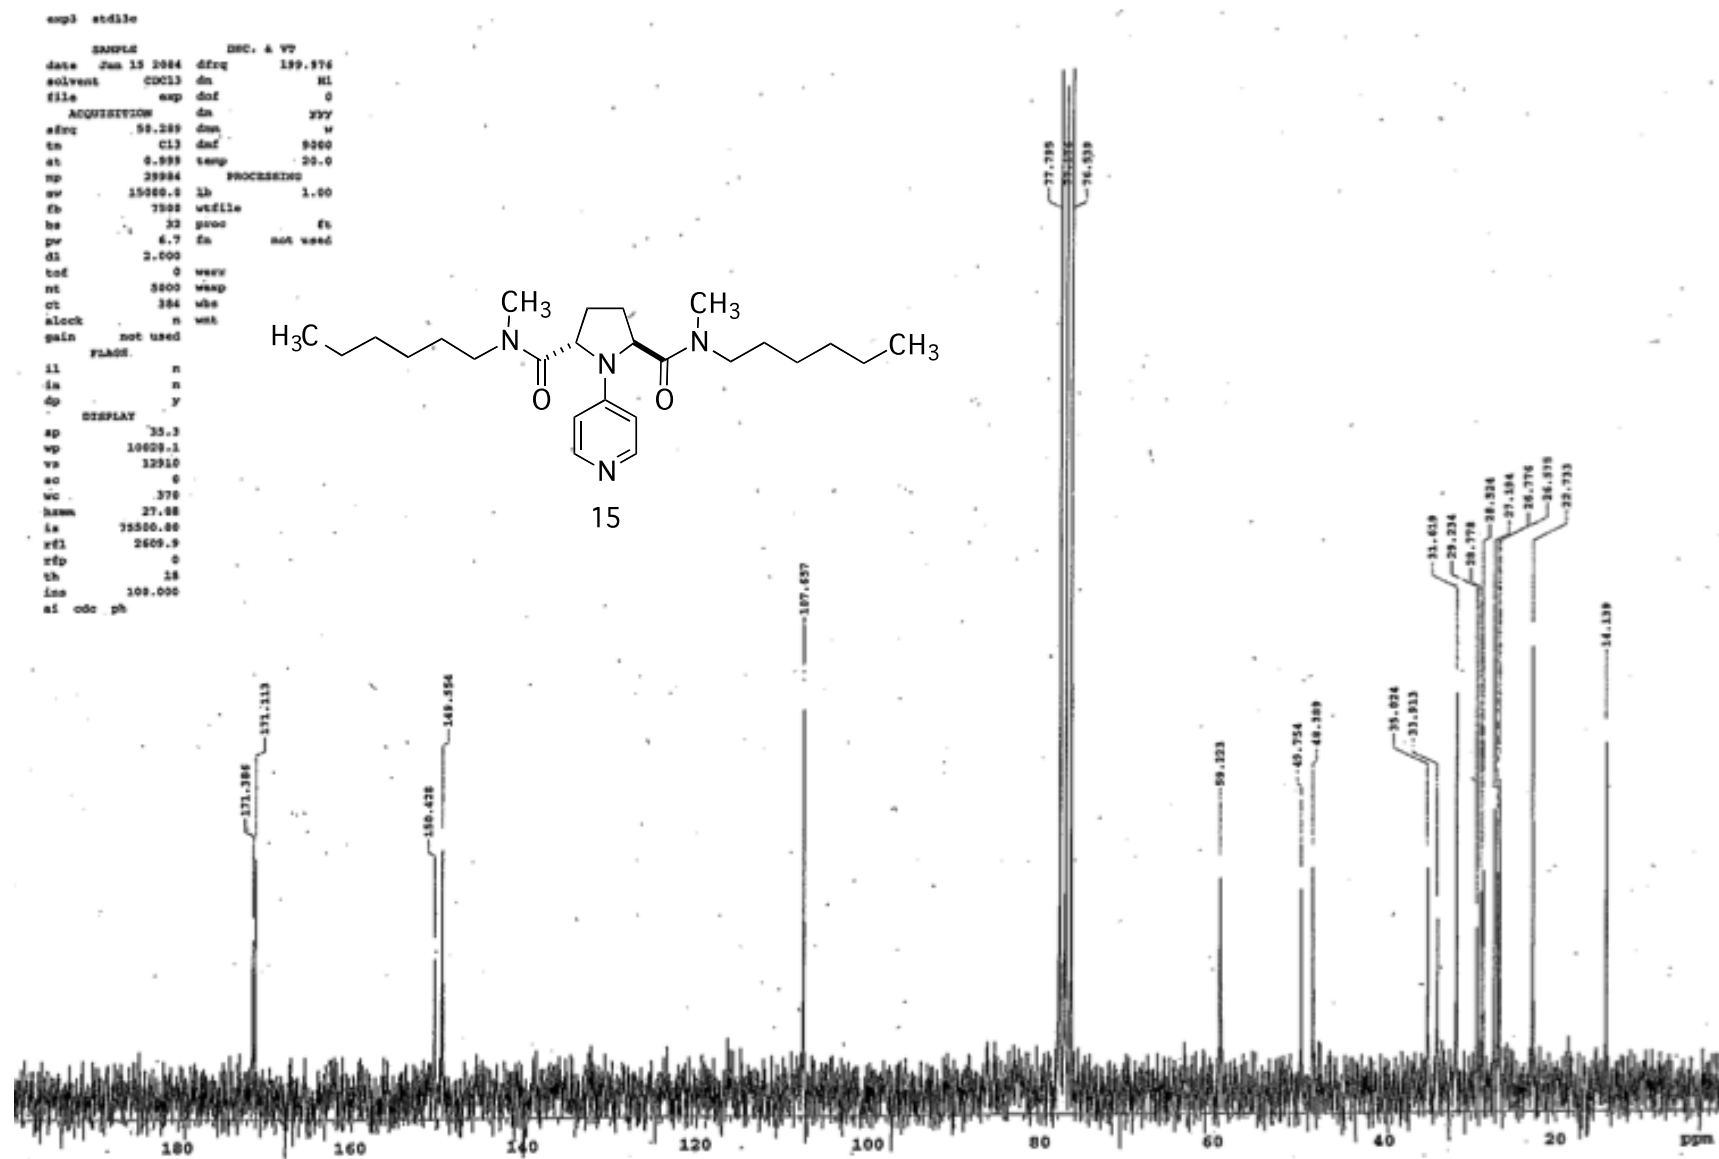

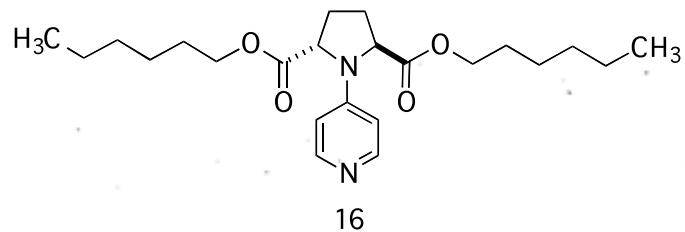

SAMPLE DEC. & VT  
 date Jan 5 2004 dfreq 199.976  
 solvent CDCl3 da 30  
 file exp dof 0  
 ACQUISITION da non  
 wfreq 199.976 dm a  
 ta M1 dmf 9000  
 at 4.000 PROCESSING  
 np 32000 wfile  
 sr 4096.0 proc ft  
 sb 7500 fa not used  
 ba 16  
 pr 11.5 wsev  
 dl 1.400 wsep  
 tof 0 sha  
 nt 16 vnt  
 ct 16  
 alock a  
 gain not used  
 FLAGS  
 li a  
 in a  
 dp y  
 DISPLAY  
 xp -20.9  
 wp 1989.6  
 vs 5839  
 sc 0  
 wc 370  
 hwm 5.49  
 ls 24244.49  
 xtl 395.9  
 xfp 0  
 sh 11  
 lna 109.000  
 al cdu ph

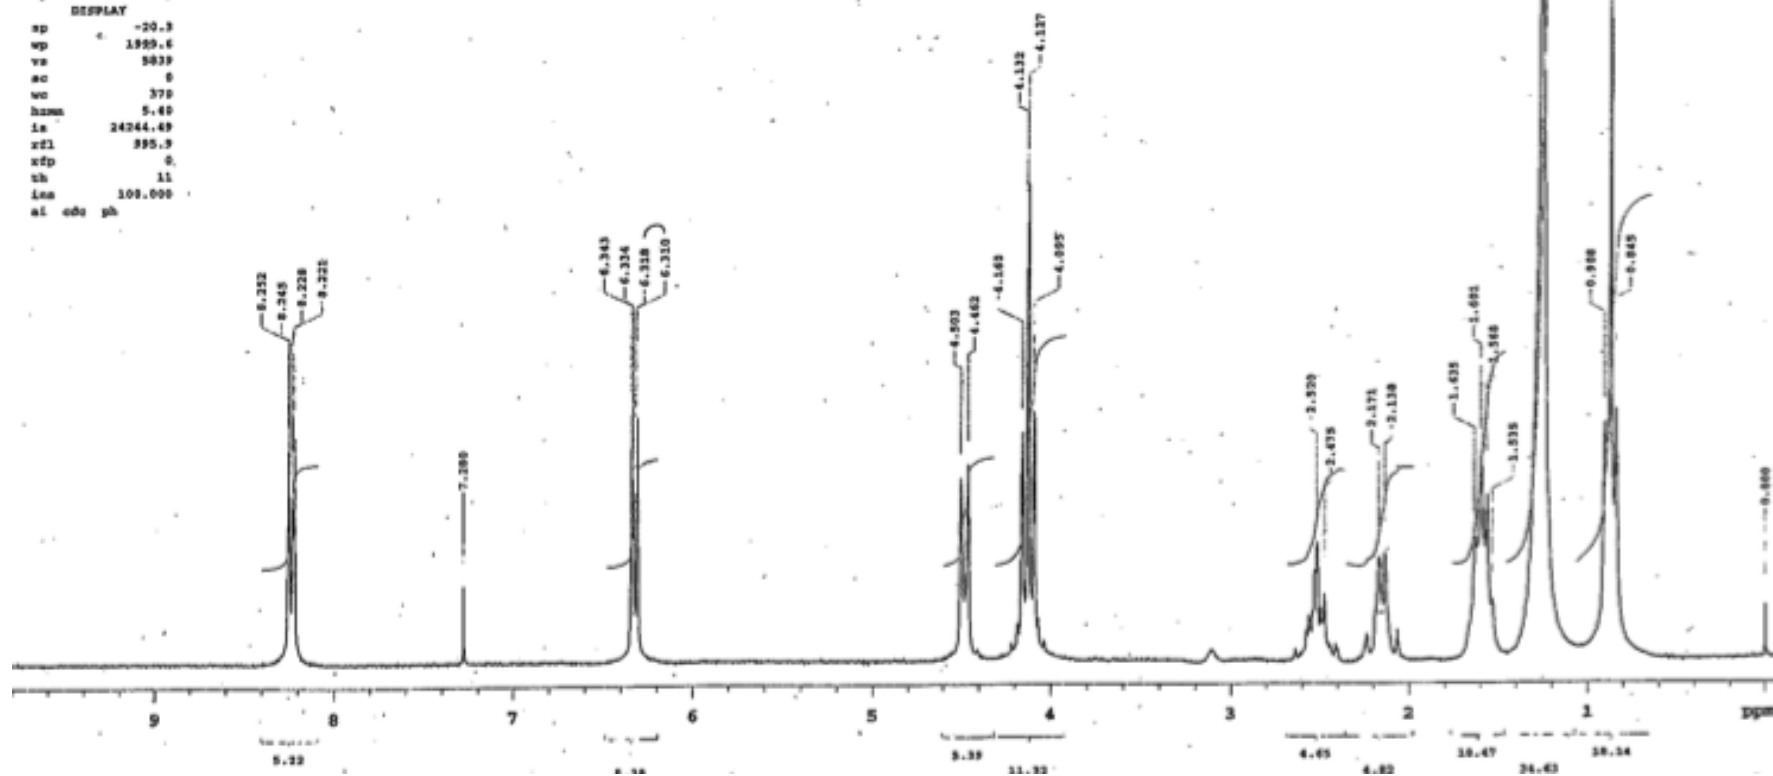



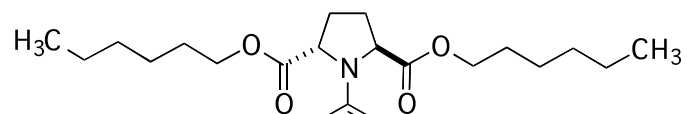

16

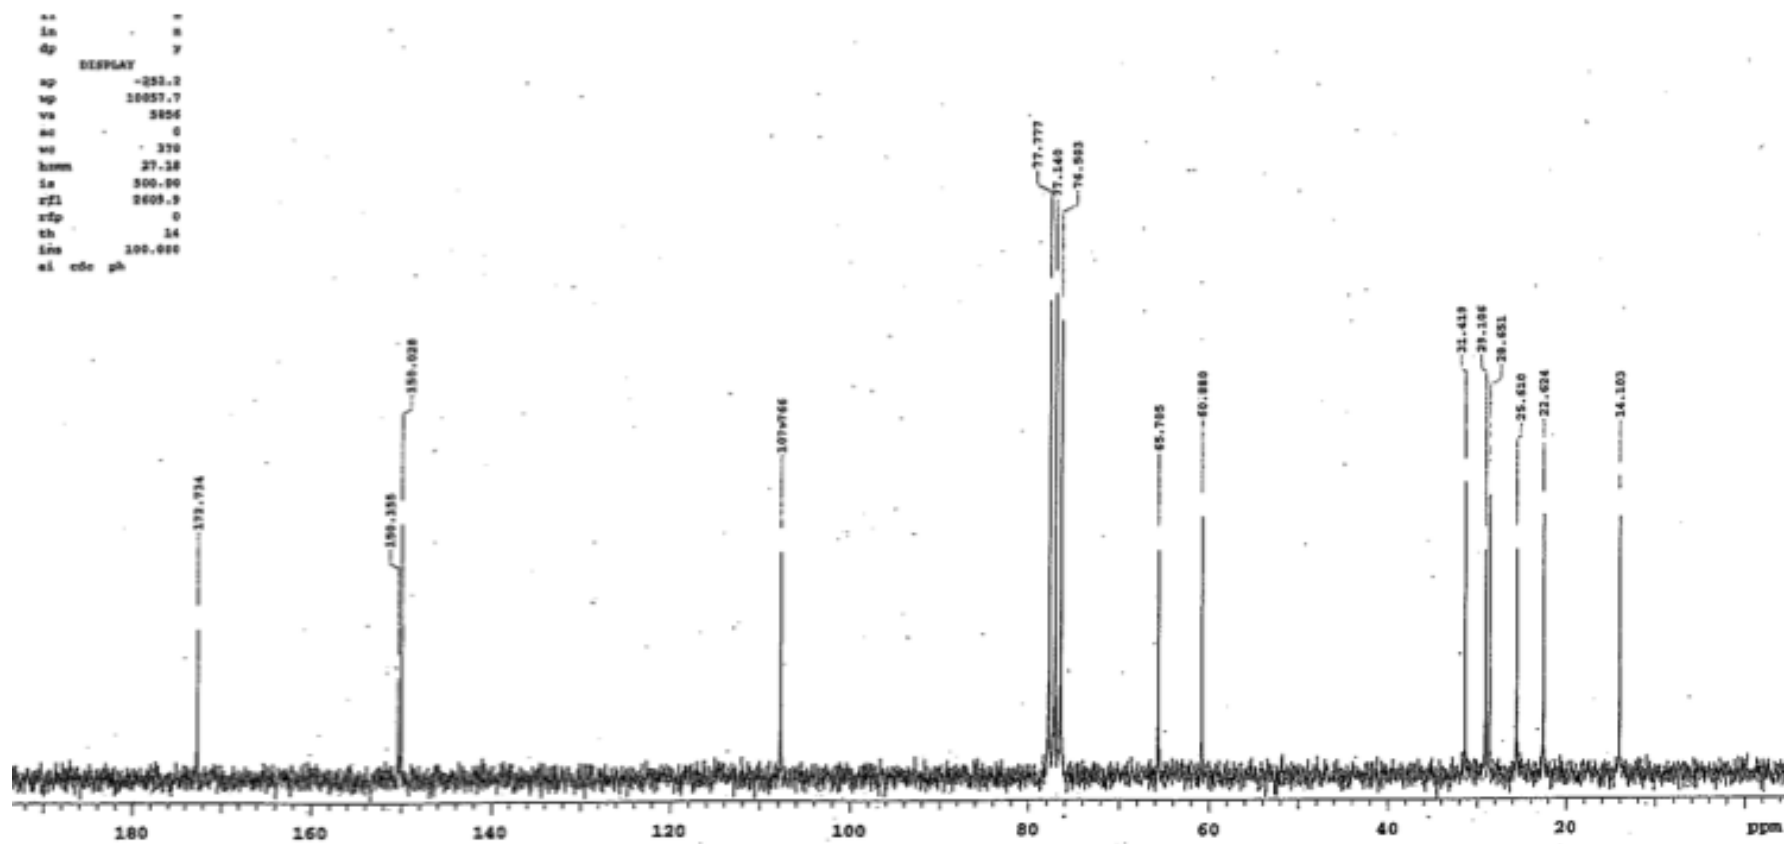

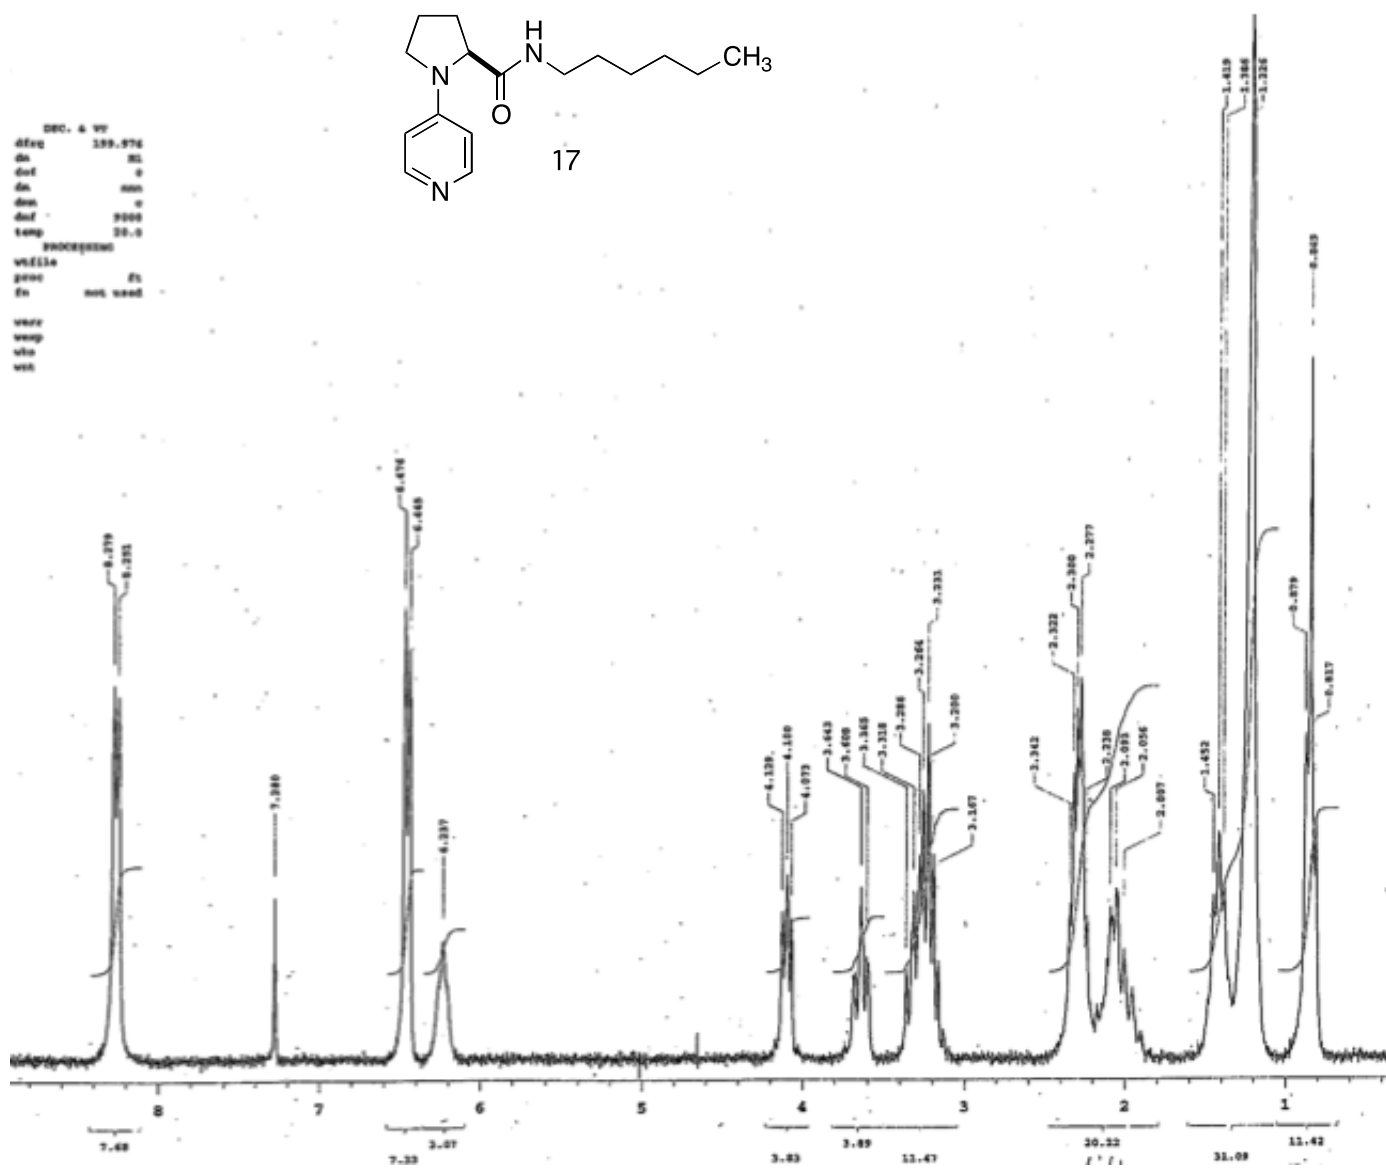

```

date Feb 10 2004 dfrq 199.976
solvent CDCl3 dn H1
file exp def 0
ACQUISITION dn YYY
sfreq 50.329 dm w
tn 0.13 def 2000
et 9.998 temp 20.0
np 29384 PROCESSING
sw 15000.0 lb 1.00
fn 7500 wfile
ba 32 proc ft
pr 6.7 fa not used
dl 2.000
tof 0 werr
sc 3000 wump
et 512 wds
clock a vnr
gain not used
PLAGE
LI n
LI n
dp F
DISPLAY
np -150.7
up 10209.7
va 10398
ao 0
wo 370
hnm 37.18
ia 509.60
rfi 3009.9
rfp 0
th 15
lax 110.000
xl odc gh

```

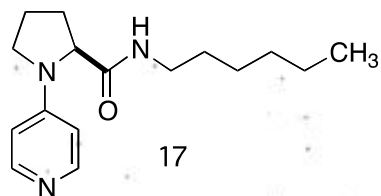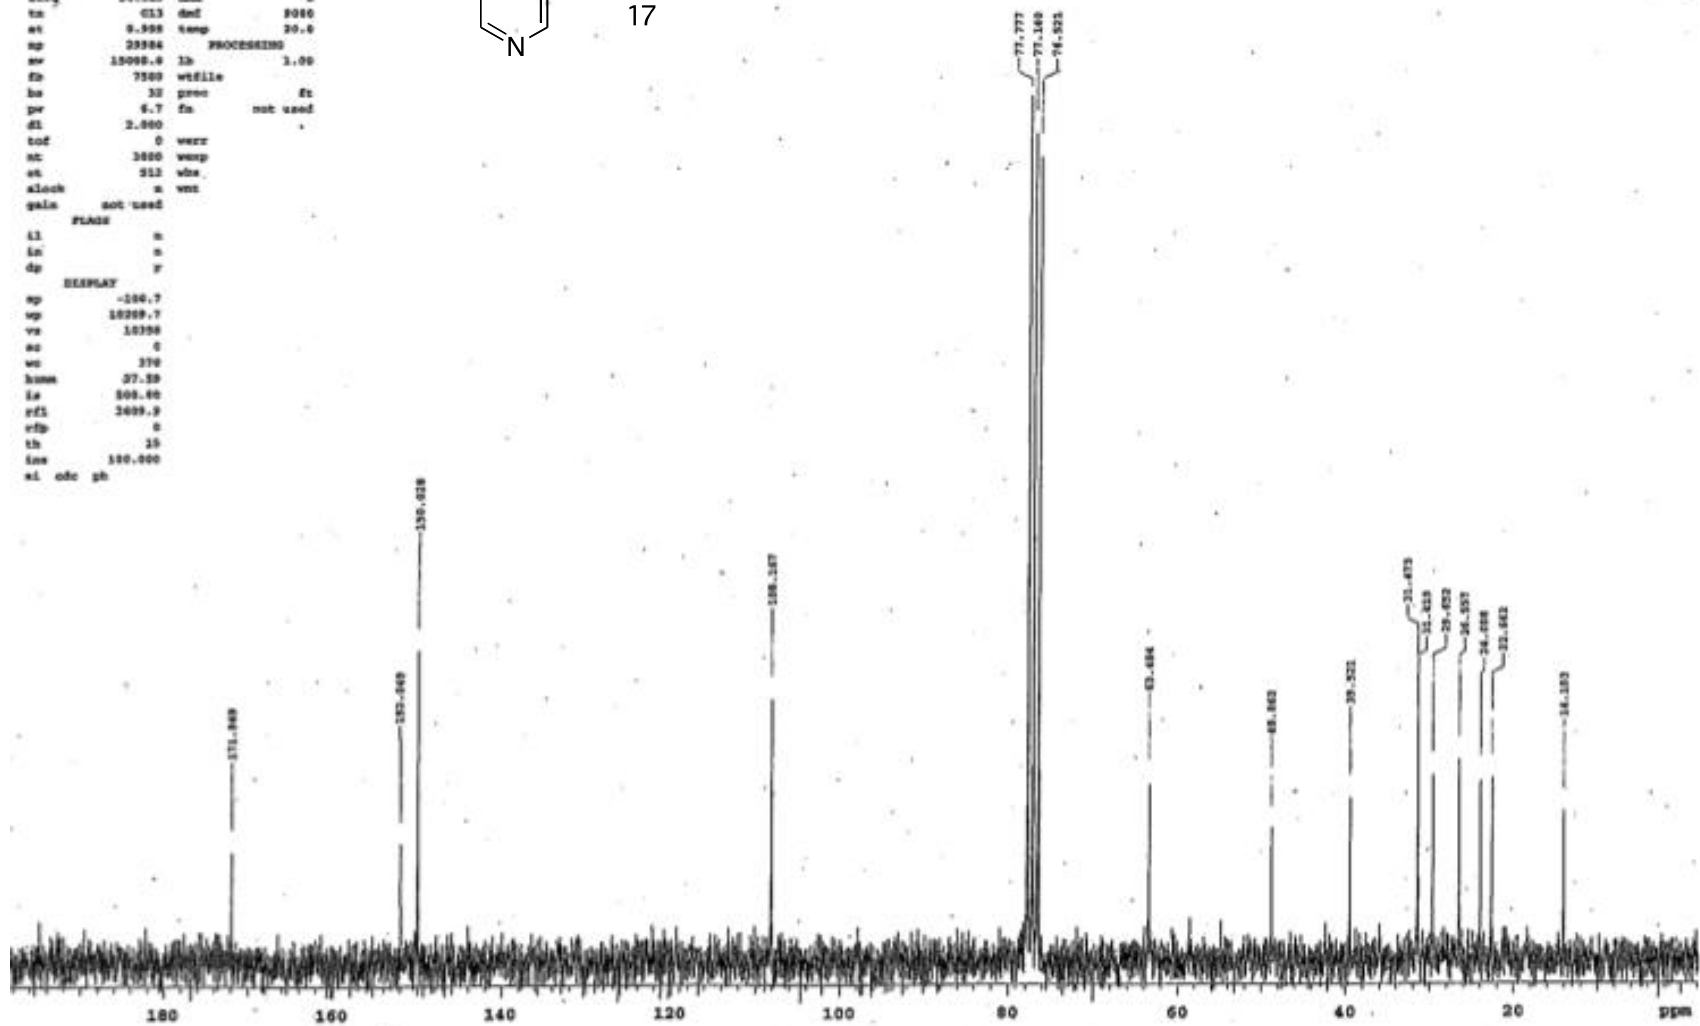

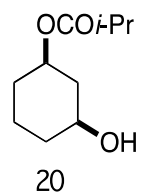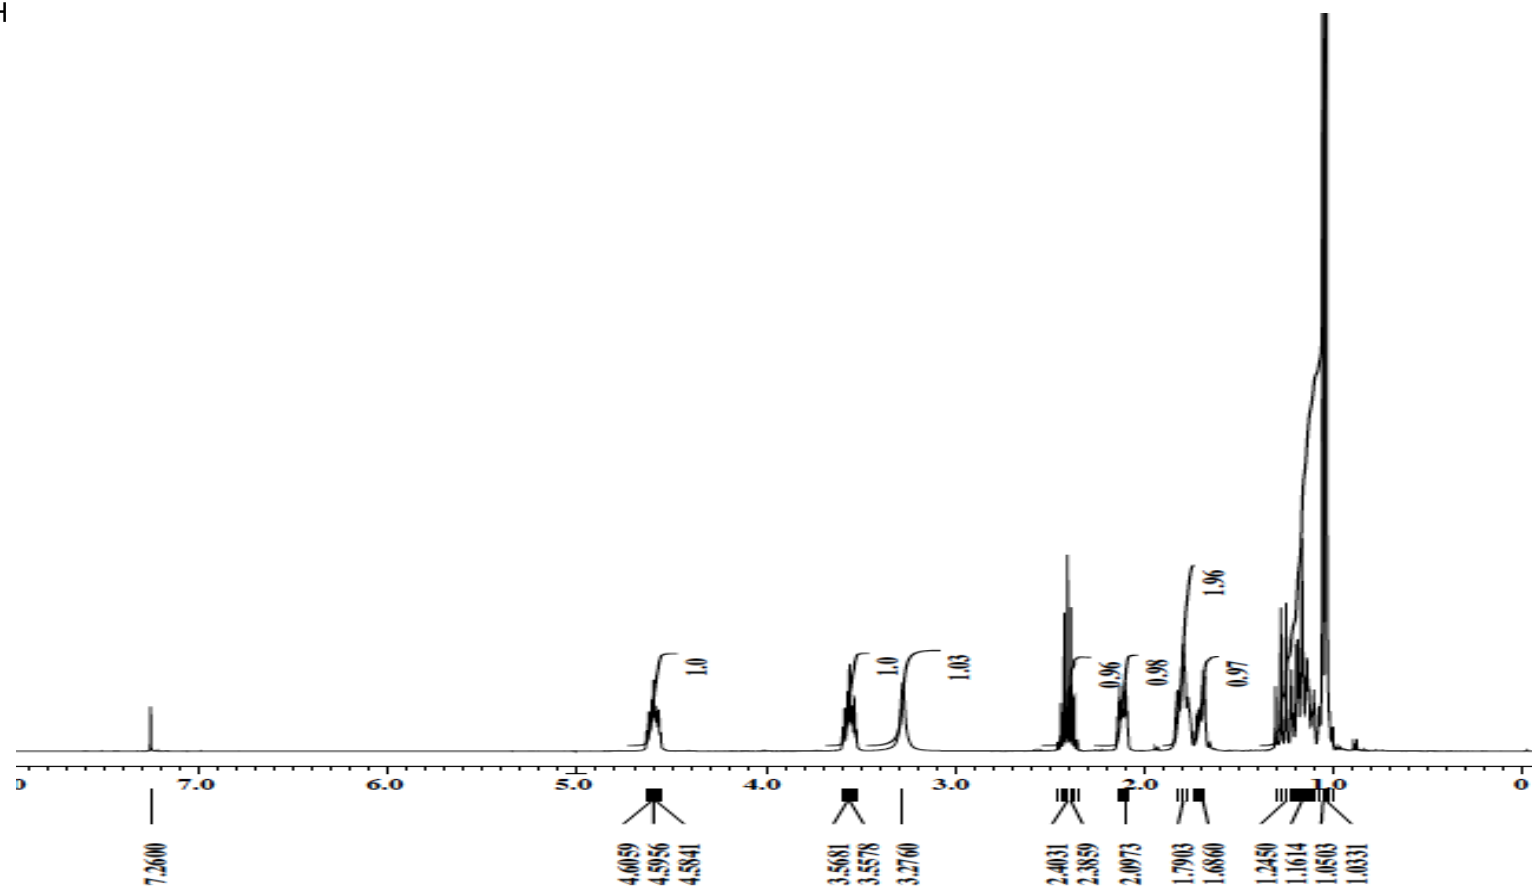

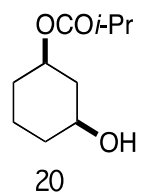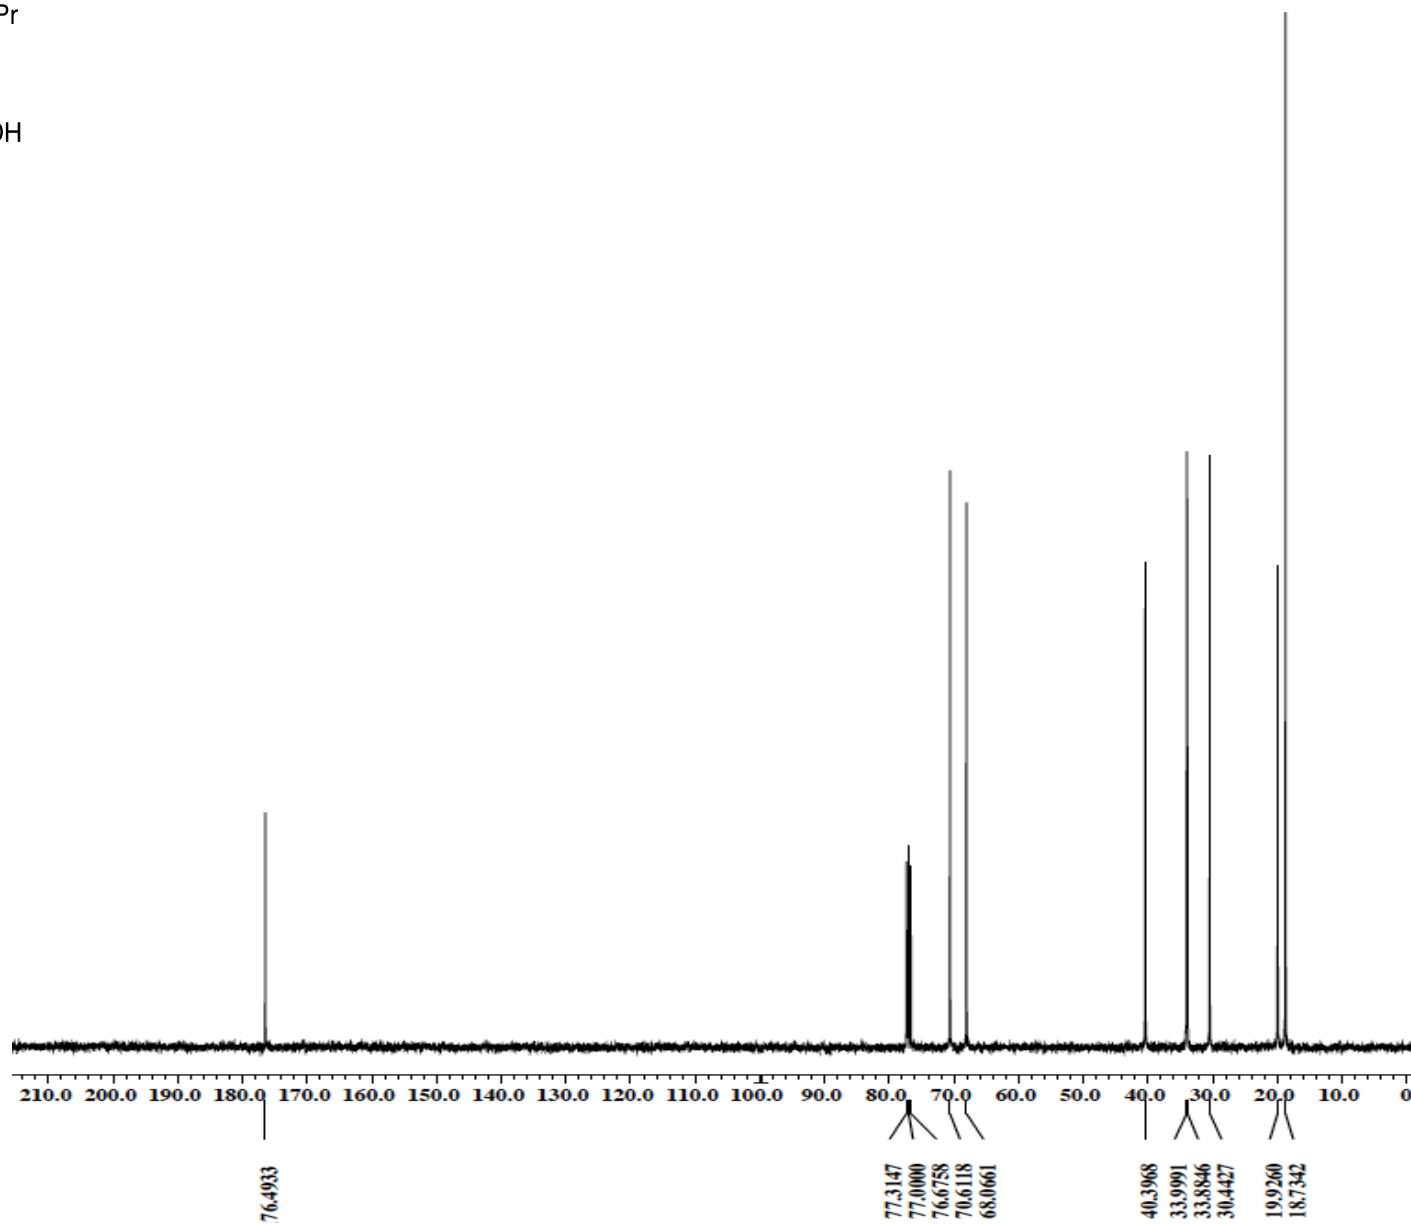

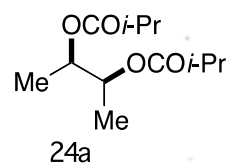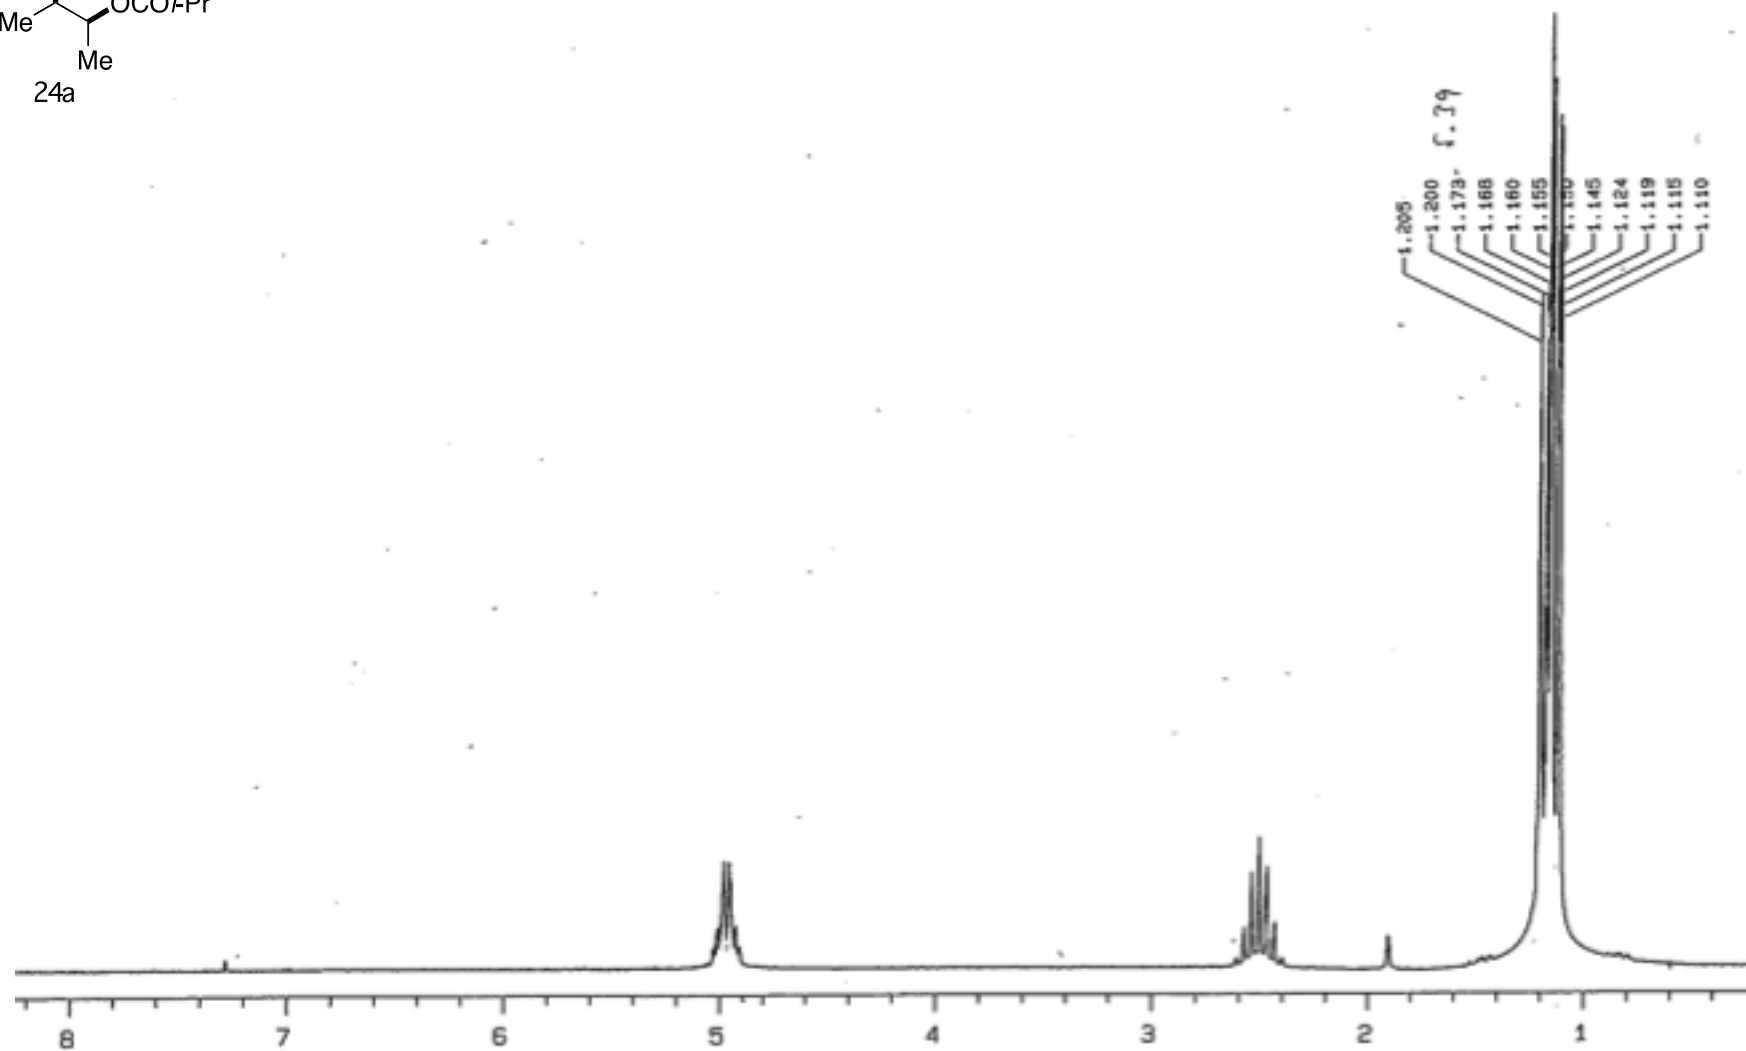

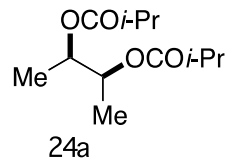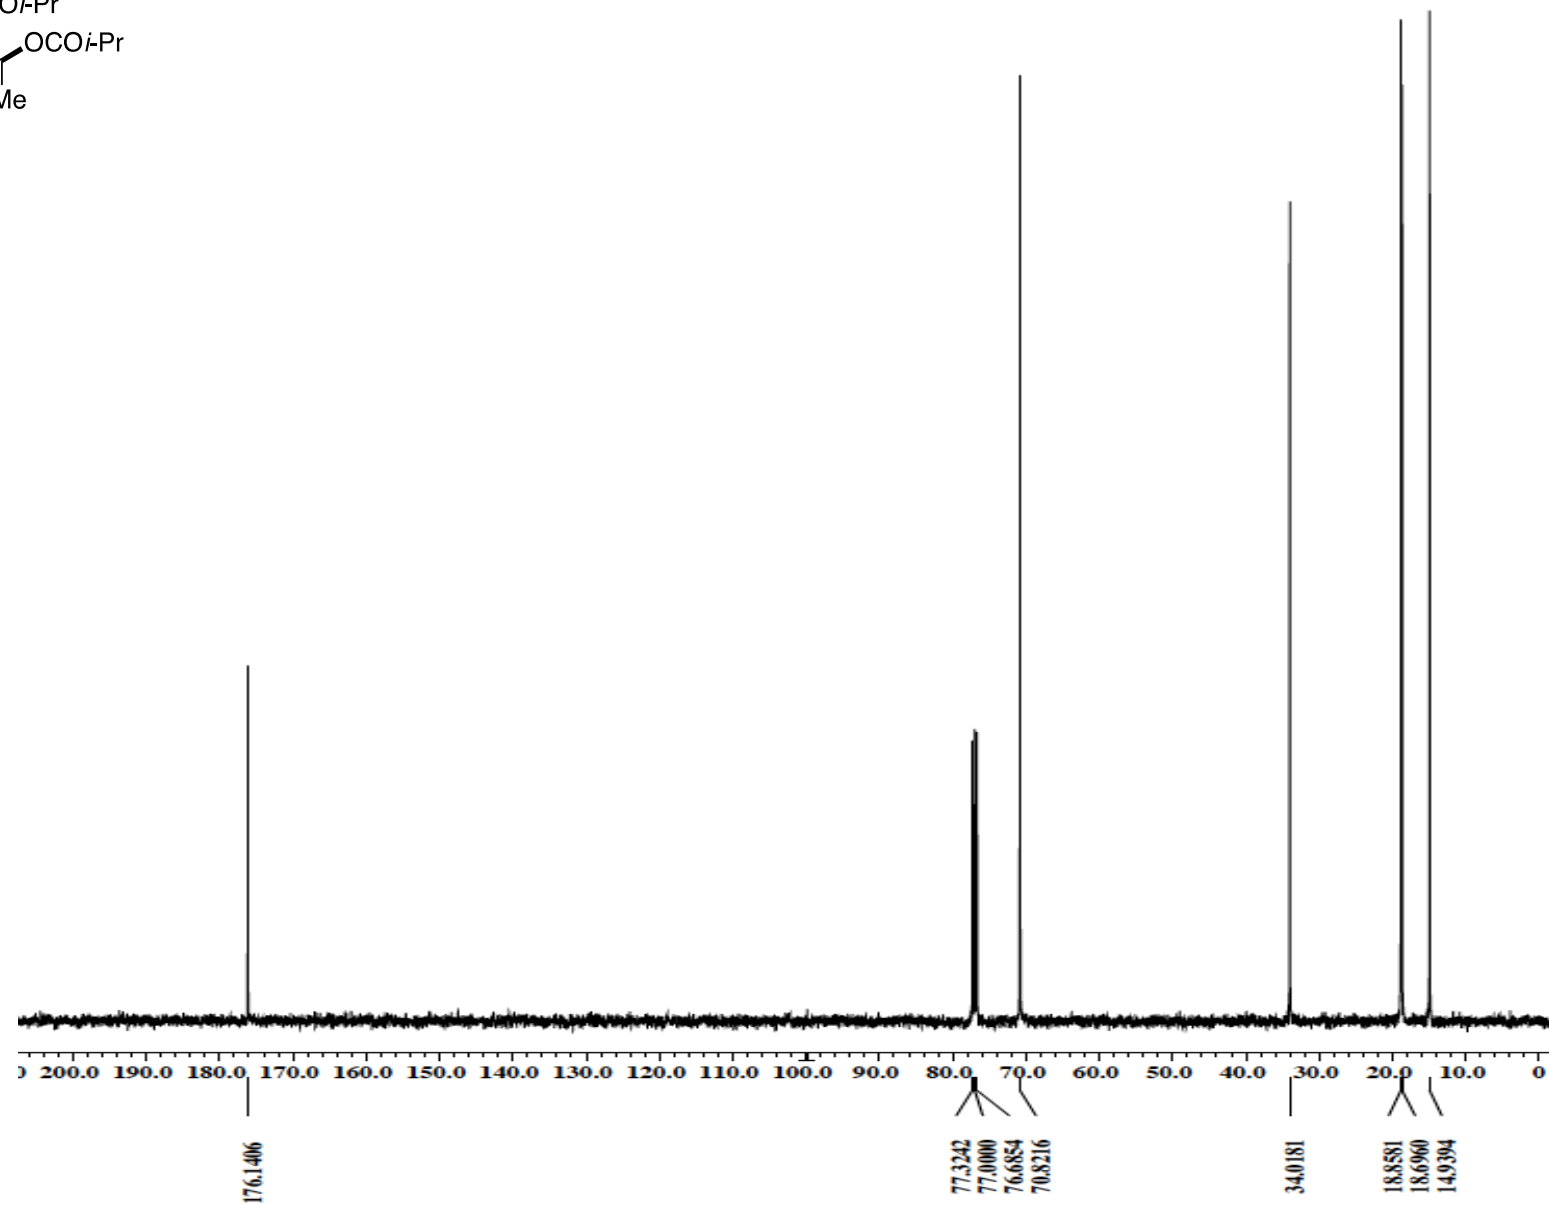

Supplement: Additional file 1 [file 1860-5397-8-203-S1.pdf]
